# Supplementary material for: Machine learning-based on cytotoxic T lymphocyte evasion gene develops a novel signature to predict prognosis and immunotherapy responses for kidney renal clear cell carcinoma patients
Source: Frontiers journal article supplement (doi:10.3389/fimmu.2023.1192428), 2023-07-31
Supplement: Data_Sheet_1.ZIP [file Data_Sheet_1.ZIP]

## Sheet: 769-P
ID	CT1	CT2	CT3	RefCT1	RefCT2	RefCT3
NC	24.3551	23.9628	23.7022	14.7238	14.6777	14.7464
siSTAT2-1	26.0807	26.0435	26.2987	15.1864	14.9777	15.2689
siSTAT2-2	26.09	26.3167	26.5906	15.5892	15.8595	15.4097
NC	22.7317	22.6037	22.7443	15.5194	15.8246	15.3217
siSTAT2-1	25.0418	24.68	24.7072	15.8116	15.3776	15.9786
siSTAT2-2	25.2412	25.7127	25.7731	16.4507	16.8138	16.86
NC	24.994	25.0849	24.8789	14.27	13.9833	14.0294
siSTAT2-1	27.0304	27.0407	27.2277	14.4424	14.3391	14.5452
siSTAT2-2	26.7517	26.6391	26.6696	14.3034	14.4533	14.4381

## Sheet: 786-0
ID	CT1	CT2	CT3	RefCT1	RefCT2	RefCT3
NC	21.5315	21.6235	21.6844	14.4715	14.4063	14.5068
siSTAT2-1	23.2945	23.3689	23.3425	13.8104	14.3194	14.1241
siSTAT2-2	23.0877	22.6911	22.7988	14.206	14.1551	14.7182
NC	21.6802	21.5819	21.0508	14.4715	14.4063	14.5068
siSTAT2-1	22.795	23.6322	23.3187	14.2952	14.4698	14.3456
siSTAT2-2	22.9675	23.2059	23.0891	14.5831	14.5326	14.9949
NC	22.8692	23.1493	22.8557	14.6711	14.989	15.2116
siSTAT2-1	24.4785	24.5798	24.4836	13.9817	14.7164	14.3836
siSTAT2-2	24.3904	24.1813	24.2945	14.8347	14.88	14.6017
