# Supplementary material for: Machine learning-based on cytotoxic T lymphocyte evasion gene develops a novel signature to predict prognosis and immunotherapy responses for kidney renal clear cell carcinoma patients
Source: Front Immunol. 2023 Jul 31;14:1192428. doi: 10.3389/fimmu.2023.1192428 (PMC10436106; doi:10.3389/fimmu.2023.1192428)
Supplement: Supplementary file 12 [file Table_3.xlsx]

## Sheet: Sheet1
Supplementary Table S3. Primer sequences for qRT-PCR
Gene	Forward (5’-3’)	Reverse (5’-3’)
GAPDH	CAGGAGGCATTGCTGATGAT	GAAGGCTGGGGCTCATTT
STAT2	ACCATTCTGGACATGGCTGG	TTTCAGTCAGCGGGAGTGAC
