# Supplementary material for: Machine learning-based on cytotoxic T lymphocyte evasion gene develops a novel signature to predict prognosis and immunotherapy responses for kidney renal clear cell carcinoma patients
Source: Front Immunol. 2023 Jul 31;14:1192428. doi: 10.3389/fimmu.2023.1192428 (PMC10436106; doi:10.3389/fimmu.2023.1192428)
Supplement: Supplementary file 13 [file Table_4.xlsx]

## Sheet: Table 4
Supplementary Table S4. Differentially expressed CTLEGs in KIRC
Gene	conMean	treatMean	logFC	pValue	FDR
B2M	908.559	2435.37	1.42249	7.97e-31	1.08e-29
IFNGR1	60.7722	105.356	0.793788	6.16e-20	3.14e-19
TAP1	23.2533	89.7098	1.94783	4.27e-33	1.16e-31
TAP2	8.4203	20.1563	1.25929	1.09e-24	7.73e-24
TAPBP	85.2866	268.546	1.65478	1.82e-35	9.9e-34
ATG10	4.89292	5.35394	0.129907	0.025875	0.0345707
CFLAR	19.751	28.5994	0.534063	1.14e-08	2.82e-08
FITM2	20.4088	18.2032	-0.164997	0.00124855	0.00195687
IFNGR2	42.4295	95.1645	1.16536	3.35e-31	4.96e-30
IKBKG	3.09781	4.10681	0.406771	2.77e-10	8.35e-10
IRF1	9.88019	24.2503	1.29539	3.49e-21	1.9e-20
JAK1	67.78	80.1222	0.241343	0.0051373	0.00728157
OTUD5	57.8846	63.8971	0.142571	0.00797595	0.010925
PTPN2	6.56387	9.7614	0.572541	1.14e-17	5.32e-17
RBCK1	34.1849	78.7603	1.20411	9.92e-34	3.23e-32
STAT1	74.9887	102.805	0.455162	0.00500369	0.0071544
STAT2	28.9377	60.0791	1.05391	1.21e-23	7.6e-23
TNFAIP3	19.0905	50.8645	1.41381	9.77e-24	6.37e-23
TNFRSF1A	68.4391	141.255	1.04541	5.23e-25	4.06e-24
TRAF2	8.77595	18.7687	1.0967	1.68e-31	2.74e-30
ATG12	7.59518	16.2342	1.09588	1.65e-30	2.07e-29
ATG5	21.6138	16.4394	-0.394802	1.68e-10	5.15e-10
BECN1	23.828	18.7359	-0.346847	4.05e-06	7.86e-06
CHIC2	26.7012	32.2225	0.271164	3.45e-05	6.19e-05
DNTTIP1	29.046	42.384	0.545181	1.27e-11	4.14e-11
ERAP1	27.8231	40.9663	0.558155	2.62e-07	5.7e-07
ERP44	45.2974	51.1094	0.174159	0.0011136	0.00179719
FADD	4.00186	5.26968	0.397045	0.00447021	0.00644818
MEN1	18.2357	21.5366	0.240024	5.07e-06	9.71e-06
MOGS	35.3592	53.3672	0.593868	3.73e-19	1.84e-18
NDUFA13	0.647682	1.2727	0.974537	8.16e-14	3.02e-13
NXT1	28.6363	37.5853	0.392325	1.6e-06	3.27e-06
OTULIN	6.72228	12.5109	0.896167	9.07e-23	5.28e-22
PDIA3	250.682	378.099	0.592905	1.46e-16	6.44e-16
PIGS	54.5549	41.1518	-0.406753	2.5e-07	5.5e-07
PPP2R2A	16.3865	18.5726	0.180672	0.00907624	0.0123286
PSMB8	40.1889	127.057	1.66061	3.92e-38	6.4e-36
RBM15	6.20785	8.3307	0.424345	2.85e-08	6.64e-08
RNF31	0.102324	0.317671	1.63439	5.96e-15	2.43e-14
SCAF4	15.2816	18.7611	0.295952	3.25e-06	6.39e-06
SMG7	35.7416	41.0031	0.198127	0.00242331	0.00362385
TAB1	19.1732	25.8066	0.428646	2.3e-12	8.15e-12
TAB2	56.1332	42.9683	-0.385582	2.64e-09	7.06e-09
TNFRSF1B	25.8185	71.9555	1.4787	1.38e-26	1.5e-25
UBE2G2	37.8341	41.4599	0.132031	0.020757	0.027962
VDAC2	91.3816	78.9585	-0.210809	0.00579188	0.00813858
VPS29	48.1971	57.5	0.254615	7.41e-07	1.57e-06
ACTB	2220.02	2837.48	0.354035	1.6e-08	3.84e-08
AGO2	7.01843	10.2524	0.546737	2.48e-07	5.5e-07
AHSA1	74.1543	61.4051	-0.272173	5.26e-10	1.53e-09
ANAPC15	3.79861	3.16643	-0.262616	8.37e-07	1.75e-06
ARF6	114.551	99.3224	-0.2058	0.00442079	0.00643382
ATP13A1	21.4782	24.3909	0.183468	0.000776407	0.00126554
BCL2L1	94.1871	108.906	0.209485	0.000688773	0.00113404
BRAT1	13.3793	22.2504	0.733829	3.06e-25	2.62e-24
CAD	10.8529	14.7698	0.444565	1.33e-07	3.05e-07
CALR	756.941	1003.93	0.407404	3.29e-09	8.51e-09
CEP55	1.1744	5.68817	2.27604	8.1e-33	1.89e-31
CHMP5	131.691	112.482	-0.227459	0.00285938	0.00419891
CREBBP	18.3739	23.3416	0.345242	6.31e-05	0.000111726
CUL3	20.7018	14.4415	-0.519533	3.47e-12	1.2e-11
DET1	0.355992	0.614359	0.787239	0.000201875	0.00035006
DICER1	22.8291	16.492	-0.46911	1.21e-09	3.39e-09
DOT1L	4.31327	5.90164	0.452335	2.9e-05	5.26e-05
DPH5	17.0027	19.392	0.1897	0.00649284	0.00904558
EIF3H	82.3286	99.2258	0.269321	5.66e-06	1.06e-05
EMC2	19.929	23.9818	0.267071	2.24e-06	4.51e-06
EMC3	43.8359	34.4947	-0.345739	6.23e-14	2.36e-13
EMC4	22.1773	25.7745	0.21686	0.000109463	0.000191855
FAS	7.88875	20.212	1.35735	4.41e-25	3.6e-24
FNTB	4.83554	6.26058	0.372619	5.17e-10	1.53e-09
GALE	24.5749	34.2925	0.48071	2.81e-08	6.63e-08
GLS	137.788	76.3827	-0.85113	1.96e-21	1.1e-20
HSPA13	35.5609	46.9939	0.402181	2.87e-06	5.71e-06
IFNAR1	51.1369	60.1071	0.23317	0.00225807	0.00340802
IFNAR2	0.434614	1.23686	1.50887	6.08e-32	1.1e-30
IKBKB	10.0433	13.1706	0.391091	5.57e-06	1.06e-05
IPPK	2.43507	1.8227	-0.417886	1.96e-09	5.43e-09
IRF9	0.643162	3.35386	2.38257	5.88e-24	3.99e-23
JAGN1	57.8615	48.1611	-0.264734	6.32e-09	1.61e-08
JMJD6	8.76849	15.0295	0.777401	1.31e-17	5.93e-17
KLF16	9.95226	16.2996	0.711739	5.1e-12	1.73e-11
MAPK1	104.233	126.254	0.276524	0.0013183	0.0020465
MGAT1	33.9341	62.9096	0.890542	7.32e-26	7.02e-25
MTA2	40.0605	52.1509	0.380514	1.06e-09	3.02e-09
N6AMT1	8.72979	7.47563	-0.223751	0.000222925	0.000382492
NCBP1	22.5614	19.4061	-0.217347	0.000662526	0.00110196
NDUFAF6	4.29077	4.99676	0.219757	0.0011837	0.00187323
NPLOC4	30.6637	37.948	0.30749	1.39e-08	3.39e-08
NUP188	15.42	18.1033	0.231457	0.00137802	0.00211903
PCBP2	57.6059	70.4389	0.290155	2.73e-09	7.19e-09
PCED1B	3.40196	11.8725	1.80319	4.15e-32	8.45e-31
PDCD6IP	69.0943	43.1205	-0.680193	6.49e-23	3.92e-22
PDSS2	32.0563	19.5821	-0.711077	2.59e-25	2.34e-24
PI4KB	41.7643	47.8704	0.196864	0.000628976	0.00105694
PIGK	41.631	27.9389	-0.575386	1.67e-13	6.04e-13
PIGT	18.383	20.8868	0.184217	0.0349376	0.0462994
PPP2R3C	8.22309	9.52242	0.211647	0.00251002	0.00371939
PRKCSH	118.385	201.423	0.766746	1.78e-26	1.81e-25
PSMB9	15.2604	73.4974	2.2679	3.13e-37	2.55e-35
RCE1	11.5092	13.7568	0.257366	0.000300334	0.000509943
RGP1	20.8447	16.4776	-0.339176	9.26e-07	1.91e-06
RIC1	9.38412	12.2812	0.388155	1.21e-05	2.24e-05
S100PBP	5.17565	8.90447	0.782788	8.72e-18	4.18e-17
SARNP	0.0384708	0.219353	2.51142	2.33e-16	9.99e-16
SETD1A	13.8638	18.7774	0.437674	2.22e-11	7.1e-11
SETDB1	9.25797	13.4723	0.541226	4.11e-11	1.29e-10
SLC25A32	0.0742153	0.165815	1.15979	1.71e-07	3.87e-07
SPCS1	58.7923	34.2737	-0.778526	2.45e-30	2.85e-29
SRRT	40.6072	51.2757	0.336539	3.64e-07	7.8e-07
SUSD6	60.9357	70.1527	0.203211	0.00679106	0.00938087
TBK1	4.75742	6.64416	0.481908	4.9e-14	1.9e-13
TMEM208	46.4688	65.0463	0.485206	3.3e-14	1.31e-13
TRADD	20.9133	61.0378	1.54528	6e-35	2.44e-33
TRPM7	18.4804	13.0183	-0.505455	6.18e-12	2.05e-11
UBR5	21.0053	17.5517	-0.259141	0.00146869	0.00223736
UFC1	102.447	131.839	0.3639	6.4e-09	1.61e-08
UXS1	62.6215	24.037	-1.3814	7.9e-25	5.85e-24
VPS16	19.1534	25.5481	0.415621	6.13e-16	2.56e-15
WDR83	2.62194	3.59952	0.457165	2.23e-09	6.06e-09
WWP2	30.9887	28.3429	-0.128754	0.00112618	0.00179968
YAP1	66.8237	50.9671	-0.390794	2.35e-05	4.31e-05
ZC3H3	13.3875	20.6474	0.625078	3.99e-20	2.1e-19
