# Supplementary material for: Machine learning-based on cytotoxic T lymphocyte evasion gene develops a novel signature to predict prognosis and immunotherapy responses for kidney renal clear cell carcinoma patients
Source: Front Immunol. 2023 Jul 31;14:1192428. doi: 10.3389/fimmu.2023.1192428 (PMC10436106; doi:10.3389/fimmu.2023.1192428)
Supplement: Supplementary file 14 [file Table_5.xlsx]

## Sheet: Sheet1
Supplementary Table S5. 66 differentially expressed CTLEGs related to prognosis
id	HR	HR.95L	HR.95H	pvalue
B2M	0.720395	0.605192	0.857526	0.000225317
IFNGR1	0.792495	0.64064	0.980347	0.0321252
ATG10	0.498468	0.356183	0.697594	4.90707e-05
CFLAR	0.81639	0.679204	0.981287	0.0306786
FITM2	0.584512	0.490826	0.69608	1.69312e-09
JAK1	0.682649	0.58622	0.794939	8.94291e-07
PTPN2	1.43261	1.01346	2.02512	0.0417857
RBCK1	1.85153	1.48912	2.30214	2.97685e-08
STAT2	1.73139	1.39376	2.15082	7.05864e-07
ATG5	0.743386	0.566679	0.975196	0.0322472
BECN1	0.729372	0.609829	0.872348	0.000549761
DNTTIP1	1.65601	1.34022	2.0462	2.97331e-06
ERAP1	0.816808	0.692702	0.963149	0.0161061
ERP44	0.576573	0.432555	0.76854	0.000173085
FADD	0.806743	0.667138	0.975563	0.0267486
NDUFA13	1.54967	1.17473	2.04427	0.00193877
PIGS	0.76958	0.63801	0.928283	0.00618312
PPP2R2A	0.620602	0.489018	0.787591	8.71154e-05
RBM15	0.717773	0.550504	0.935865	0.0143007
RNF31	3.08121	1.82756	5.1948	2.41565e-05
SMG7	0.719734	0.571619	0.906227	0.00514903
TAB2	0.734439	0.612696	0.880372	0.00084436
VDAC2	0.647971	0.511499	0.820855	0.00032319
VPS29	0.663413	0.461861	0.952918	0.0263524
ACTB	1.41656	1.01564	1.97575	0.0402321
ANAPC15	0.566677	0.375083	0.856138	0.00698165
ARF6	0.747099	0.600082	0.930135	0.00911375
ATP13A1	1.74133	1.21506	2.49555	0.00252032
BCL2L1	0.719299	0.541355	0.955733	0.023074
CAD	1.31335	1.02625	1.68077	0.0303231
CEP55	1.63319	1.40136	1.90339	3.3871e-10
CHMP5	0.600102	0.501433	0.718186	2.52043e-08
CREBBP	0.660412	0.540159	0.807438	5.21899e-05
CUL3	0.680307	0.574591	0.805474	7.80492e-06
DET1	1.44783	1.02728	2.04054	0.03454
DICER1	0.77054	0.640391	0.927141	0.00575593
DPH5	0.689213	0.523242	0.907831	0.0081
EIF3H	0.693368	0.542222	0.886647	0.00351219
EMC2	0.695458	0.542653	0.89129	0.00411602
EMC3	0.468735	0.331921	0.66194	1.68569e-05
EMC4	0.671716	0.549478	0.821146	0.00010329
HSPA13	0.78573	0.657628	0.938786	0.00791667
IFNAR1	0.645319	0.532897	0.781457	7.29415e-06
IFNAR2	1.71548	1.09583	2.68552	0.018266
IPPK	0.54848	0.409786	0.734116	5.38926e-05
IRF9	1.38721	1.1839	1.62544	5.17295e-05
JAGN1	0.659349	0.469186	0.926587	0.0164321
MAPK1	0.678913	0.576395	0.799663	3.5401e-06
NCBP1	0.692216	0.550123	0.87101	0.00170069
PCED1B	1.23663	1.02453	1.49263	0.0269403
PDCD6IP	0.628711	0.501367	0.788401	5.8502e-05
PDSS2	0.603379	0.490716	0.741909	1.66009e-06
PIGK	0.635943	0.516655	0.782773	1.94858e-05
PPP2R3C	0.734863	0.554414	0.974045	0.0321221
RGP1	0.591312	0.499029	0.70066	1.28706e-09
RIC1	0.758102	0.613431	0.936893	0.0103675
SETDB1	0.7692	0.623434	0.949049	0.0143735
SLC25A32	2.54239	1.13465	5.69671	0.0233997
SPCS1	0.70361	0.528954	0.935937	0.0157457
SUSD6	0.702261	0.589575	0.836484	7.47073e-05
TRPM7	0.756805	0.626353	0.914427	0.0038929
UBR5	0.789872	0.661167	0.943632	0.00934159
UXS1	0.702535	0.553787	0.891237	0.00363127
WWP2	0.648625	0.524114	0.802714	6.87053e-05
YAP1	0.795601	0.655181	0.966116	0.0210052
ZC3H3	1.86189	1.34593	2.57562	0.000173795
