# Supplementary material for: Machine learning-based on cytotoxic T lymphocyte evasion gene develops a novel signature to predict prognosis and immunotherapy responses for kidney renal clear cell carcinoma patients
Source: Front Immunol. 2023 Jul 31;14:1192428. doi: 10.3389/fimmu.2023.1192428 (PMC10436106; doi:10.3389/fimmu.2023.1192428)
Supplement: Supplementary file 15 [file Table_6.xls]

## Sheet: cindex_mat
Supplementary Table S6 : C-index of 89 predictive models in the cohorts
Model	TCGA	E-MTAB-1980	GSE22541	AHHXMC
survivalSVM	0.561653	0.54447	0.506276	0.668241
CoxBoost+survivalSVM	0.539475	0.607754	0.563459	0.748524
Ridge	0.719041	0.762828	0.648536	0.512397
Lasso+survivalSVM	0.514375	0.63797	0.567643	0.694215
SuperPC	0.65024	0.608894	0.511855	0.733176
CoxBoost+Ridge	0.740581	0.748575	0.709902	0.766234
Enet[alpha=0.1]	0.72416	0.754846	0.679219	0.61039
CoxBoost+Enet[alpha=0.1]	0.74485	0.742303	0.728033	0.761511
Enet[alpha=0.2]	0.727313	0.751425	0.684798	0.737898
Enet[alpha=0.3]	0.732645	0.749145	0.691771	0.755608
CoxBoost+Enet[alpha=0.3]	0.745381	0.736032	0.736402	0.75915
CoxBoost+Enet[alpha=0.2]	0.744123	0.745154	0.726639	0.762692
Enet[alpha=0.4]	0.729563	0.750285	0.687587	0.720189
CoxBoost+Enet[alpha=0.4]	0.745239	0.736602	0.736402	0.75915
Lasso+CoxBoost	0.712345	0.77309	0.620642	0.711924
Enet[alpha=0.5]	0.728057	0.749715	0.684798	0.70366
CoxBoost	0.734009	0.751995	0.677824	0.72255
CoxBoost+Enet[alpha=0.5]	0.745186	0.737172	0.733612	0.75915
Enet[alpha=0.6]	0.732202	0.749715	0.688982	0.72137
CoxBoost+Enet[alpha=0.6]	0.7457	0.735462	0.739191	0.75915
CoxBoost+Enet[alpha=0.7]	0.745434	0.736602	0.737796	0.75915
CoxBoost+Enet[alpha=0.8]	0.745913	0.735462	0.739191	0.760331
Enet[alpha=0.8]	0.73578	0.745724	0.705718	0.731995
Enet[alpha=0.9]	0.736205	0.746294	0.702929	0.733176
Lasso	0.710857	0.761117	0.613668	0.658796
Enet[alpha=0.7]	0.711158	0.760547	0.615063	0.658796
CoxBoost+Enet[alpha=0.9]	0.744371	0.740593	0.735007	0.749705
CoxBoost+Lasso	0.745346	0.738312	0.740586	0.756789
Lasso+plsRcox	0.71052	0.777651	0.606695	0.687131
CoxBoost+plsRcox	0.737587	0.753706	0.704324	0.761511
CoxBoost+StepCox[forward]	0.743787	0.72691	0.74477	0.754427
Lasso+StepCox[forward]	0.710892	0.776511	0.62622	0.702479
RSF+survivalSVM	0.606079	0.746864	0.619247	0.526564
CoxBoost+SuperPC	0.64296	0.610604	0.527197	0.765053
StepCox[forward]	0.769809	0.698404	0.675035	0.707202
plsRcox	0.722176	0.748005	0.630404	0.528926
RSF+Ridge	0.68914	0.704105	0.620642	0.61157
RSF+Enet[alpha=0.1]	0.689193	0.701824	0.623431	0.618654
Lasso+SuperPC	0.64296	0.610604	0.527197	0.765053
RSF+plsRcox	0.689104	0.713797	0.616457	0.606848
RSF+StepCox[forward]	0.689954	0.696693	0.631799	0.661157
RSF+Lasso	0.690415	0.697263	0.630404	0.657615
RSF+CoxBoost	0.690628	0.698404	0.631799	0.652893
StepCox[both]+Ridge	0.761713	0.732041	0.683403	0.676505
StepCox[backward]+Ridge	0.760739	0.736602	0.679219	0.676505
StepCox[both]+plsRcox	0.745027	0.750855	0.691771	0.688312
StepCox[backward]+plsRcox	0.745027	0.750855	0.691771	0.688312
StepCox[both]+Enet[alpha=0.9]	0.747967	0.757127	0.704324	0.694215
StepCox[backward]+Enet[alpha=0.9]	0.763786	0.677309	0.662483	0.674144
StepCox[both]+Enet[alpha=0.1]	0.752591	0.753136	0.683403	0.687131
StepCox[backward]+Enet[alpha=0.1]	0.755744	0.748005	0.686192	0.68595
StepCox[both]+Enet[alpha=0.8]	0.763892	0.670468	0.658298	0.672963
StepCox[backward]+Enet[alpha=0.8]	0.736117	0.753136	0.686192	0.702479
StepCox[both]+Enet[alpha=0.2]	0.744265	0.760547	0.688982	0.696576
StepCox[backward]+Enet[alpha=0.2]	0.736347	0.762828	0.682008	0.700118
StepCox[both]+Lasso	0.737339	0.750285	0.690377	0.706021
StepCox[backward]+Lasso	0.763697	0.669327	0.658298	0.672963
StepCox[both]+Enet[alpha=0.6]	0.763804	0.671038	0.658298	0.672963
StepCox[backward]+Enet[alpha=0.6]	0.738614	0.748575	0.695955	0.706021
CoxBoost+GBM	0.797212	0.493729	0.633891	0.626919
StepCox[both]+Enet[alpha=0.7]	0.763733	0.673888	0.662483	0.674144
StepCox[backward]+Enet[alpha=0.7]	0.735497	0.754276	0.684798	0.702479
StepCox[both]	0.763662	0.665906	0.654114	0.671783
StepCox[backward]	0.763662	0.665906	0.654114	0.671783
CoxBoost+StepCox[both]	0.744318	0.714937	0.737796	0.743802
CoxBoost+StepCox[backward]	0.744318	0.714937	0.737796	0.743802
StepCox[both]+Enet[alpha=0.4]	0.763857	0.692132	0.666667	0.674144
StepCox[backward]+Enet[alpha=0.4]	0.7629	0.704675	0.675035	0.680047
StepCox[both]+Enet[alpha=0.3]	0.762953	0.716078	0.680614	0.681228
StepCox[backward]+Enet[alpha=0.3]	0.762351	0.724629	0.684798	0.682409
StepCox[both]+CoxBoost	0.740864	0.750285	0.686192	0.719008
StepCox[backward]+CoxBoost	0.741785	0.750285	0.682008	0.713105
StepCox[both]+Enet[alpha=0.5]	0.764034	0.676739	0.662483	0.674144
StepCox[backward]+Enet[alpha=0.5]	0.763892	0.690422	0.668061	0.675325
CoxBoost+RSF	0.929942	0.554732	0.632497	0.638725
RSF+SuperPC	0.636795	0.759407	0.62622	0.4451
RSF	0.942501	0.586659	0.622036	0.597403
Lasso+GBM	0.779764	0.518814	0.396095	0.651712
RSF+GBM	0.761696	0.474059	0.590656	0.548996
GBM	0.813774	0.594926	0.382845	0.716647
StepCox[both]+survivalSVM	0.563212	0.509122	0.521618	0.701299
StepCox[backward]+survivalSVM	0.563212	0.509122	0.521618	0.701299
Lasso+RSF	0.921669	0.472634	0.615063	0.651122
StepCox[both]+GBM	0.805165	0.536773	0.36053	0.687131
StepCox[backward]+GBM	0.802367	0.554162	0.358438	0.691854
StepCox[both]+RSF	0.934335	0.586374	0.640167	0.634002
StepCox[backward]+RSF	0.934795	0.54732	0.645746	0.650531
StepCox[both]+SuperPC	0.61212	0.640251	0.543933	0.735537
StepCox[backward]+SuperPC	0.61212	0.640251	0.543933	0.735537
