# Supplementary material for: Machine learning-based on cytotoxic T lymphocyte evasion gene develops a novel signature to predict prognosis and immunotherapy responses for kidney renal clear cell carcinoma patients
Source: Front Immunol. 2023 Jul 31;14:1192428. doi: 10.3389/fimmu.2023.1192428 (PMC10436106; doi:10.3389/fimmu.2023.1192428)
Supplement: Supplementary file 16 [file Table_7.xls]

## Sheet: Supplementary Table S7
Supplementary Table S7. The 101 collected signatures
Model	PMID	Author	Journal	SYMBOL	Coef
Model-1	31140607	Song	J Cell Physiol	KRT222	0.349609
Model-1	31140607	Song	J Cell Physiol	LENG8	0.005281
Model-1	31140607	Song	J Cell Physiol	APOB	0.006542
Model-1	31140607	Song	J Cell Physiol	SLC3A1	-0.0021
Model-1	31140607	Song	J Cell Physiol	SCD5	-0.003789
Model-1	31140607	Song	J Cell Physiol	AQP1	-0.000622
Model-2	36276091	Yin	Front Oncol	AKR1C3	0.0253
Model-2	36276091	Yin	Front Oncol	SAT1	-0.0173
Model-2	36276091	Yin	Front Oncol	FANCD2	0.0657
Model-2	36276091	Yin	Front Oncol	HSBP1	-0.041
Model-2	36276091	Yin	Front Oncol	SQLE	0.0151
Model-3	36275737	Wang	Front Immunol-1	FOXD2-AS1	0.1213
Model-3	36275737	Wang	Front Immunol-1	SLC12A8	0.0521
Model-3	36275737	Wang	Front Immunol-1	CRB3	-0.0297
Model-3	36275737	Wang	Front Immunol-1	AC024060.2	0.1289
Model-3	36275737	Wang	Front Immunol-1	XPOT	0.0364
Model-3	36275737	Wang	Front Immunol-1	AR	-0.0884
Model-3	36275737	Wang	Front Immunol-1	CUBN	-0.0058
Model-3	36275737	Wang	Front Immunol-1	ITGA8	-0.0523
Model-3	36275737	Wang	Front Immunol-1	KCNN3	-0.1239
Model-4	36248876	Fu	Front Immunol	AIM2	0.009877
Model-4	36248876	Fu	Front Immunol	CASP4	0.042783
Model-4	36248876	Fu	Front Immunol	GSDMB	0.134083
Model-4	36248876	Fu	Front Immunol	IFI16	0.016047
Model-4	36248876	Fu	Front Immunol	NOD2	0.085619
Model-4	36248876	Fu	Front Immunol	RBCK1	0.007173
Model-4	36248876	Fu	Front Immunol	TLR3	-0.024375
Model-4	36248876	Fu	Front Immunol	TNIP1	-0.006708
Model-4	36248876	Fu	Front Immunol	TRAF2	0.073096
Model-4	36248876	Fu	Front Immunol	ZBP1	-0.16928
Model-5	35903358	Wang	Front Genet	SHC1	0.0153349
Model-5	35903358	Wang	Front Genet	SRC	0.0430173
Model-5	35903358	Wang	Front Genet	EREG	0.0736184
Model-5	35903358	Wang	Front Genet	EIF4EBP1	0.000614229
Model-5	35903358	Wang	Front Genet	PIK3CD	0.00682271
Model-5	35903358	Wang	Front Genet	GAB1	-0.0733341
Model-5	35903358	Wang	Front Genet	SOS2	-0.0265212
Model-5	35903358	Wang	Front Genet	AKT3	-0.0230517
Model-5	35903358	Wang	Front Genet	ERBB3	-0.00724096
Model-5	35903358	Wang	Front Genet	MAPK3	-0.00631116
Model-5	35903358	Wang	Front Genet	TGFA	-0.00133101
Model-5	35903358	Wang	Front Genet	CDKN1A	-0.00380455
Model-6	34606472	Tian	Aging (Albany NY)	PDK4	-0.121
Model-6	34606472	Tian	Aging (Albany NY)	MPP1	-0.492
Model-6	34606472	Tian	Aging (Albany NY)	ASGR1	0.22
Model-6	34606472	Tian	Aging (Albany NY)	MS4A14	0.176
Model-6	34606472	Tian	Aging (Albany NY)	FCER1A	-0.184
Model-6	34606472	Tian	Aging (Albany NY)	MX2	0.5
Model-7	34988121	Zhang	Front Mol Biosci	CANX	-0.4879
Model-7	34988121	Zhang	Front Mol Biosci	NAMPT	0.3075
Model-7	34988121	Zhang	Front Mol Biosci	BIRC5	-0.3041
Model-7	34988121	Zhang	Front Mol Biosci	BID	0.694
Model-8	33224313	Han	Dis Markers-1	BID	0.6544
Model-8	33224313	Han	Dis Markers-1	CX3CL1	-0.2684
Model-8	33224313	Han	Dis Markers-1	EIF4EBP1	0.1526
Model-8	33224313	Han	Dis Markers-1	VMP1	0.278
Model-8	33224313	Han	Dis Markers-1	SPHK1	0.1581
Model-9	35845137	Wang	Dis Markers	CASP3	0.121
Model-9	35845137	Wang	Dis Markers	CASP4	0.107
Model-9	35845137	Wang	Dis Markers	CASP5	0.207
Model-9	35845137	Wang	Dis Markers	AIM2	0.098
Model-9	35845137	Wang	Dis Markers	CASP9	0.331
Model-9	35845137	Wang	Dis Markers	GSDMB	0.286
Model-9	35845137	Wang	Dis Markers	PYCARD	0.0003
Model-9	35845137	Wang	Dis Markers	CHMP3	-0.35
Model-9	35845137	Wang	Dis Markers	CHMP4C	-0.172
Model-10	36353536	Tao	Front Oncol	COL9A2	0.0788
Model-10	36353536	Tao	Front Oncol	COL4A6	0.1435
Model-10	36353536	Tao	Front Oncol	NPNT	-0.0198
Model-10	36353536	Tao	Front Oncol	COL4A4	-0.0378
Model-10	36353536	Tao	Front Oncol	ITGAX	0.0082
Model-10	36353536	Tao	Front Oncol	SEMA3B	0.0027
Model-10	36353536	Tao	Front Oncol	HMCN1	-0.1336
Model-10	36353536	Tao	Front Oncol	ADAMTS2	0.0221
Model-10	36353536	Tao	Front Oncol	MMP7	0.0003
Model-10	36353536	Tao	Front Oncol	FN1	0.0001
Model-10	36353536	Tao	Front Oncol	VCAN	0.002
Model-10	36353536	Tao	Front Oncol	FREM1	-0.0392
Model-10	36353536	Tao	Front Oncol	PXDN	0.0103
Model-10	36353536	Tao	Front Oncol	VWA1	-0.0075
Model-10	36353536	Tao	Front Oncol	GPC2	0.2294
Model-10	36353536	Tao	Front Oncol	ADAMTS4	0.009
Model-11	36349258	Gan	J Healthc Eng	CASP3	0.507955
Model-11	36349258	Gan	J Healthc Eng	CASP4	0.40461
Model-11	36349258	Gan	J Healthc Eng	GSDMB	0.292399
Model-11	36349258	Gan	J Healthc Eng	GZMA	-0.220535
Model-12	36209249	Long	Biol Direct	SDHC	0.118247
Model-12	36209249	Long	Biol Direct	PRDX3	0.0458936
Model-12	36209249	Long	Biol Direct	DLD	0.0231898
Model-12	36209249	Long	Biol Direct	AIFM1	-0.0220802
Model-12	36209249	Long	Biol Direct	HSPA9	0.102977
Model-12	36209249	Long	Biol Direct	ACAT1	-0.124995
Model-12	36209249	Long	Biol Direct	SDHD	0.148567
Model-12	36209249	Long	Biol Direct	ACADSB	-0.134498
Model-12	36209249	Long	Biol Direct	MPC1	-0.114319
Model-12	36209249	Long	Biol Direct	ATP6V1C1	0.00234876
Model-12	36209249	Long	Biol Direct	OGDH	-0.190095
Model-12	36209249	Long	Biol Direct	ALDH6A1	-0.0978977
Model-12	36209249	Long	Biol Direct	COX5B	0.143022
Model-12	36209249	Long	Biol Direct	ATP1B1	-0.0402035
Model-12	36209249	Long	Biol Direct	BDH2	-0.0544301
Model-12	36209249	Long	Biol Direct	PDK4	-0.135349
Model-12	36209249	Long	Biol Direct	RHOT2	0.364573
Model-13	36159988	Zuo	Front Genet	COL7A1	0.051227
Model-13	36159988	Zuo	Front Genet	LCTL	2.31801
Model-13	36159988	Zuo	Front Genet	NPR3	-0.0167625
Model-13	36159988	Zuo	Front Genet	ZFHX4	0.295409
Model-14	35646056	Li	Front Genet-1	FOXG1	0.06305
Model-14	35646056	Li	Front Genet-1	FOXM1	0.23742
Model-14	35646056	Li	Front Genet-1	GNRH1	0.25733
Model-14	35646056	Li	Front Genet-1	HAMP	0.10576
Model-14	35646056	Li	Front Genet-1	IGFBP2	0.18935
Model-14	35646056	Li	Front Genet-1	IL10	0.21992
Model-14	35646056	Li	Front Genet-1	MPEG1	-0.27295
Model-14	35646056	Li	Front Genet-1	VASH1	-0.33497
Model-15	35155566	Sun	Front Mol Biosci	SCTR	-0.1637
Model-15	35155566	Sun	Front Mol Biosci	SSTR1	-0.2632
Model-15	35155566	Sun	Front Mol Biosci	PRKCG	0.1711
Model-15	35155566	Sun	Front Mol Biosci	FGF17	0.7824
Model-16	35141153	Ning	Front Oncol	GPC3	0.1611
Model-16	35141153	Ning	Front Oncol	KIF5A	0.0781
Model-16	35141153	Ning	Front Oncol	PLAUR	0.2598
Model-16	35141153	Ning	Front Oncol	ANKZF1	0.4296
Model-16	35141153	Ning	Front Oncol	ETS1	-0.2765
Model-16	35141153	Ning	Front Oncol	SELENBP1	0.4578
Model-17	34778292	Che	Front Med (Lausanne)	ARNT	-0.00975269
Model-17	34778292	Che	Front Med (Lausanne)	CREBBP	-0.0893972
Model-17	34778292	Che	Front Med (Lausanne)	FGF2	0.0709937
Model-17	34778292	Che	Front Med (Lausanne)	FGFR2	0.0483977
Model-17	34778292	Che	Front Med (Lausanne)	HIF1A	0.00251441
Model-17	34778292	Che	Front Med (Lausanne)	MAPK1	-0.000795321
Model-17	34778292	Che	Front Med (Lausanne)	MAPK14	0.0409213
Model-17	34778292	Che	Front Med (Lausanne)	NOS3	0.0384415
Model-17	34778292	Che	Front Med (Lausanne)	PDGFRA	0.0627468
Model-17	34778292	Che	Front Med (Lausanne)	PIK3CA	-0.0746482
Model-17	34778292	Che	Front Med (Lausanne)	PLCG1	0.0532842
Model-17	34778292	Che	Front Med (Lausanne)	SRC	0.0178312
Model-17	34778292	Che	Front Med (Lausanne)	TEK	-0.0728867
Model-17	34778292	Che	Front Med (Lausanne)	TIMP3	-0.0695267
Model-17	34778292	Che	Front Med (Lausanne)	VEGFA	0.00186115
Model-18	34660292	Huang	Front Oncol	ALDOB	-0.105197
Model-18	34660292	Huang	Front Oncol	ESRRG	-0.275676
Model-18	34660292	Huang	Front Oncol	EFHD1	-0.269554
Model-19	34568046	Sun	Front Oncol-1	CASP4	0.0137
Model-19	34568046	Sun	Front Oncol-1	NLRP6	-0.0624
Model-19	34568046	Sun	Front Oncol-1	AIM2	0.0227
Model-19	34568046	Sun	Front Oncol-1	IFI16	0.0149
Model-19	34568046	Sun	Front Oncol-1	PYCARD	0.0059
Model-19	34568046	Sun	Front Oncol-1	GSDMB	0.2049
Model-20	34535962	Chen	Cancer Med	NPR3	-0.113151
Model-20	34535962	Chen	Cancer Med	MDK	0.0467655
Model-20	34535962	Chen	Cancer Med	IFNE	0.0246016
Model-20	34535962	Chen	Cancer Med	NTF4	0.0399806
Model-20	34535962	Chen	Cancer Med	PTGER1	0.0118192
Model-20	34535962	Chen	Cancer Med	GAL	0.0367739
Model-20	34535962	Chen	Cancer Med	FGF23	0.0201288
Model-20	34535962	Chen	Cancer Med	CXCL13	0.00648274
Model-21	34187413	Li	BMC Cancer	ICAM1	0.00586481
Model-21	34187413	Li	BMC Cancer	IFNG	0.0336286
Model-21	34187413	Li	BMC Cancer	CXCL5	0.00449394
Model-21	34187413	Li	BMC Cancer	XCL1	0.178774
Model-21	34187413	Li	BMC Cancer	TGFB1	0.0114011
Model-21	34187413	Li	BMC Cancer	PDGFRA	0.034697
Model-21	34187413	Li	BMC Cancer	GNAI1	0.00617576
Model-21	34187413	Li	BMC Cancer	TNFSF11	0.321236
Model-21	34187413	Li	BMC Cancer	HMOX1	-0.00150623
Model-21	34187413	Li	BMC Cancer	CCL22	-0.456893
Model-21	34187413	Li	BMC Cancer	IL4	3.9283
Model-21	34187413	Li	BMC Cancer	CRP	0.00127583
Model-21	34187413	Li	BMC Cancer	EDN1	-0.00254187
Model-21	34187413	Li	BMC Cancer	AVP	1.25039
Model-21	34187413	Li	BMC Cancer	CSF2	0.873479
Model-21	34187413	Li	BMC Cancer	GAL	0.0818075
Model-21	34187413	Li	BMC Cancer	GNRH1	0.124431
Model-21	34187413	Li	BMC Cancer	PPY	0.275246
Model-22	34149798	Lu	Front Genet	SMARCA2	-0.2545
Model-22	34149798	Lu	Front Genet	BRPF3	-0.1522
Model-22	34149798	Lu	Front Genet	KAT2A	0.1213
Model-22	34149798	Lu	Front Genet	EP300	-0.0445
Model-22	34149798	Lu	Front Genet	KAT2B	-0.0714
Model-22	34149798	Lu	Front Genet	SP140	0.1056
Model-22	34149798	Lu	Front Genet	BRD9	0.4356
Model-23	32547955	Chen	Front Oncol-2	BID	0.57
Model-23	32547955	Chen	Front Oncol-2	ERBB2	0.2696
Model-23	32547955	Chen	Front Oncol-2	CASP4	0.4565
Model-23	32547955	Chen	Front Oncol-2	IFNG	0.2726
Model-23	32547955	Chen	Front Oncol-2	ATG16L2	0.2433
Model-23	32547955	Chen	Front Oncol-2	EIF4EBP1	0.2629
Model-23	32547955	Chen	Front Oncol-2	PRKCQ	-0.4475
Model-23	32547955	Chen	Front Oncol-2	BAG1	-0.3273
Model-23	32547955	Chen	Front Oncol-2	CX3CL1	-0.2611
Model-23	32547955	Chen	Front Oncol-2	RGS19	-0.4178
Model-23	32547955	Chen	Front Oncol-2	BNIP3	-0.337
Model-24	32952743	Zhao	Dis Markers	ADGRV1	-3.1648
Model-24	32952743	Zhao	Dis Markers	APCDD1L	0.2204
Model-24	32952743	Zhao	Dis Markers	GREM1	0.3514
Model-24	32952743	Zhao	Dis Markers	GJB6	0.5583
Model-24	32952743	Zhao	Dis Markers	MZB1	0.4944
Model-24	32952743	Zhao	Dis Markers	POU2AF1	-1.1655
Model-24	32952743	Zhao	Dis Markers	RAP1GAP	0.2392
Model-24	32952743	Zhao	Dis Markers	PAEP	0.1515
Model-24	32952743	Zhao	Dis Markers	MIXL1	1.2305
Model-24	32952743	Zhao	Dis Markers	PPARGC1A	-0.3431
Model-25	32789468	He	Biosci Rep	CYP3A7	-0.52
Model-25	32789468	He	Biosci Rep	CNTNAP5	-0.47
Model-25	32789468	He	Biosci Rep	ADCY2	-0.31
Model-25	32789468	He	Biosci Rep	TOX3	-0.25
Model-25	32789468	He	Biosci Rep	PLG	-0.16
Model-25	32789468	He	Biosci Rep	ENAM	0.35
Model-25	32789468	He	Biosci Rep	COL7A1	0.61
Model-26	32737333	Liu	Sci Rep	ALDH6A1	-0.03677
Model-26	32737333	Liu	Sci Rep	FBP1	-0.00467
Model-26	32737333	Liu	Sci Rep	HAO2	-0.001642
Model-26	32737333	Liu	Sci Rep	TYMP	0.001219
Model-26	32737333	Liu	Sci Rep	PSAT1	0.01105
Model-26	32737333	Liu	Sci Rep	IL4I1	0.018708
Model-26	32737333	Liu	Sci Rep	P4HA3	0.020459
Model-26	32737333	Liu	Sci Rep	HK3	0.023879
Model-26	32737333	Liu	Sci Rep	CPT1B	0.092914
Model-26	32737333	Liu	Sci Rep	CYP26A1	0.240626
Model-27	32002016	Zhang	Cancer Cell Int-2	PADI1	0.0986233
Model-27	32002016	Zhang	Cancer Cell Int-2	ATP6V0D2	-0.0952664
Model-27	32002016	Zhang	Cancer Cell Int-2	DPP6	-0.114938
Model-27	32002016	Zhang	Cancer Cell Int-2	C9orf135	-0.0614418
Model-27	32002016	Zhang	Cancer Cell Int-2	PLG	-0.111647
Model-28	30941304	Wu	Front Oncol	SELENBP	0.93
Model-28	30941304	Wu	Front Oncol	SERPINA5	0.74
Model-28	30941304	Wu	Front Oncol	GABRA2	0.39
Model-28	30941304	Wu	Front Oncol	TYRP1	0.29
Model-28	30941304	Wu	Front Oncol	ATP6V1C2	0.02
Model-28	30941304	Wu	Front Oncol	PCSK1N	-1.54
Model-28	30941304	Wu	Front Oncol	PREX1	-1.24
Model-28	30941304	Wu	Front Oncol	HLA-DRA	-0.53
Model-28	30941304	Wu	Front Oncol	ANK3	-0.47
Model-29	34646862	Liu	Front Mol Biosci	TRPC4AP	0.0286
Model-29	34646862	Liu	Front Mol Biosci	TEK	-0.0636
Model-29	34646862	Liu	Front Mol Biosci	IL17RD	-0.1686
Model-29	34646862	Liu	Front Mol Biosci	PTH	1.4582
Model-29	34646862	Liu	Front Mol Biosci	PDIA2	0.1083
Model-29	34646862	Liu	Front Mol Biosci	SOCS3	0.0053
Model-29	34646862	Liu	Front Mol Biosci	FCGRT	-0.0117
Model-29	34646862	Liu	Front Mol Biosci	GDF5	0.807
Model-30	36531222	Sun	Front Genet	FDX1	-0.499501
Model-30	36531222	Sun	Front Genet	DLD	-0.593221
Model-30	36531222	Sun	Front Genet	DLAT	-0.659154
Model-30	36531222	Sun	Front Genet	CDKN2A	0.199117
Model-31	36516496	Wang	Aging (Albany NY)	AGR2	0.0726303
Model-31	36516496	Wang	Aging (Albany NY)	HAO2	-0.177355
Model-31	36516496	Wang	Aging (Albany NY)	IGF2BP1	0.184007
Model-31	36516496	Wang	Aging (Albany NY)	MCCD1	-0.0897278
Model-31	36516496	Wang	Aging (Albany NY)	OLFM4	-0.0895266
Model-32	36429070	Al	Danakh-Cells	HHLA2	0.764
Model-32	36429070	Al	Danakh-Cells	TNFRSF12A	1.283
Model-32	36429070	Al	Danakh-Cells	HLA-G	0.859
Model-32	36429070	Al	Danakh-Cells	NECTIN2	1.604
Model-32	36429070	Al	Danakh-Cells	TNFRSF25	1.298
Model-32	36429070	Al	Danakh-Cells	TNFSF14	1.235
Model-32	36429070	Al	Danakh-Cells	LAIR1	1.475
Model-32	36429070	Al	Danakh-Cells	TNFSF15	0.627
Model-32	36429070	Al	Danakh-Cells	TNFSF4	1.558
Model-33	36292781	Zhang	Genes (Basel)	L20RB	0.14
Model-33	36292781	Zhang	Genes (Basel)	ADAM8	0.247
Model-33	36292781	Zhang	Genes (Basel)	IL21	0.715
Model-33	36292781	Zhang	Genes (Basel)	CRHBP	-0.302
Model-33	36292781	Zhang	Genes (Basel)	CXCL5	0.116
Model-33	36292781	Zhang	Genes (Basel)	UCN	0.583
Model-33	36292781	Zhang	Genes (Basel)	ENPP3	-0.227
Model-34	36247012	Zhang	Front Cell Dev Biol-1	FDX1	-0.3233
Model-34	36247012	Zhang	Front Cell Dev Biol-1	LIAS	-0.0652
Model-34	36247012	Zhang	Front Cell Dev Biol-1	DLAT	-0.2261
Model-34	36247012	Zhang	Front Cell Dev Biol-1	MTF1	-0.1638
Model-34	36247012	Zhang	Front Cell Dev Biol-1	GLS	0.0304
Model-34	36247012	Zhang	Front Cell Dev Biol-1	CDKN2A	0.1192
Model-35	36247009	Fang	Front Cell Dev Biol	TYROBP	0.67
Model-35	36247009	Fang	Front Cell Dev Biol	APOC1	1.07
Model-35	36247009	Fang	Front Cell Dev Biol	CSTA	1.31
Model-35	36247009	Fang	Front Cell Dev Biol	LY96	1.42
Model-35	36247009	Fang	Front Cell Dev Biol	LAPTM5	0.54
Model-35	36247009	Fang	Front Cell Dev Biol	CD300A	1.26
Model-35	36247009	Fang	Front Cell Dev Biol	ALOX5	1.03
Model-35	36247009	Fang	Front Cell Dev Biol	C1QB	0.78
Model-35	36247009	Fang	Front Cell Dev Biol	C1QA	1.8
Model-36	36237326	Zeng	Front Oncol	ATP1A3	1.20857
Model-36	36237326	Zeng	Front Oncol	GNB3	0.192896
Model-36	36237326	Zeng	Front Oncol	SLC24A3	0.165657
Model-36	36237326	Zeng	Front Oncol	DPP6	0.141493
Model-36	36237326	Zeng	Front Oncol	STK39	0.087753
Model-36	36237326	Zeng	Front Oncol	STX1A	-0.0357362
Model-36	36237326	Zeng	Front Oncol	KCNA7	-0.126889
Model-36	36237326	Zeng	Front Oncol	KCNH5	-0.337625
Model-36	36237326	Zeng	Front Oncol	NSF	-0.437329
Model-36	36237326	Zeng	Front Oncol	GNB4	-0.97738
Model-37	36230866	Zhang	Cancers (Basel)	CPT2	-0.2219
Model-37	36230866	Zhang	Cancers (Basel)	ACADL	-0.0416
Model-37	36230866	Zhang	Cancers (Basel)	PTPRG	-0.2152
Model-37	36230866	Zhang	Cancers (Basel)	CPOX	0.0897
Model-37	36230866	Zhang	Cancers (Basel)	TDO2	0.0429
Model-37	36230866	Zhang	Cancers (Basel)	HPGD	-0.0428
Model-37	36230866	Zhang	Cancers (Basel)	ENO2	0.0104
Model-37	36230866	Zhang	Cancers (Basel)	ENO3	0.0944
Model-37	36230866	Zhang	Cancers (Basel)	ALDH3A2	-0.0298
Model-37	36230866	Zhang	Cancers (Basel)	ACAA2	-0.0536
Model-38	36186450	Nie	Front Genet	HSD17B3	0.2468
Model-38	36186450	Nie	Front Genet	HPGD	-0.1651
Model-38	36186450	Nie	Front Genet	CEL	0.3335
Model-38	36186450	Nie	Front Genet	PTGDS	0.1054
Model-38	36186450	Nie	Front Genet	SCD5	-0.118
Model-38	36186450	Nie	Front Genet	DPEP1	-0.1239
Model-38	36186450	Nie	Front Genet	GAD2	1.2038
Model-38	36186450	Nie	Front Genet	ADH6	-0.188
Model-38	36186450	Nie	Front Genet	ALOX12B	-0.5212
Model-38	36186450	Nie	Front Genet	IL4I1	0.261
Model-38	36186450	Nie	Front Genet	ENO2	0.1566
Model-39	36163033	Li	BMC Med Genomics	ELANE	0.00323438
Model-39	36163033	Li	BMC Med Genomics	AIM2	0.0771947
Model-39	36163033	Li	BMC Med Genomics	GSDMB	0.267608
Model-39	36163033	Li	BMC Med Genomics	IL6	0.113881
Model-39	36163033	Li	BMC Med Genomics	NLRP1	-0.0891872
Model-39	36163033	Li	BMC Med Genomics	NOD2	0.00428953
Model-40	36158645	Zhang	Front Oncol-1	RIMKLA	-0.151
Model-40	36158645	Zhang	Front Oncol-1	HMGCLL1	-0.378
Model-40	36158645	Zhang	Front Oncol-1	MARS1	1.032
Model-40	36158645	Zhang	Front Oncol-1	LARS2	-0.398
Model-40	36158645	Zhang	Front Oncol-1	FOXE1	0.284
Model-40	36158645	Zhang	Front Oncol-1	GCNT4	-0.227
Model-40	36158645	Zhang	Front Oncol-1	IYD	-0.324
Model-40	36158645	Zhang	Front Oncol-1	COLQ	0.277
Model-41	36119844	Wei	Am J Cancer Res	PYCR1	0.0302
Model-41	36119844	Wei	Am J Cancer Res	GLUD2	-0.3437
Model-41	36119844	Wei	Am J Cancer Res	CAD	0.0227
Model-41	36119844	Wei	Am J Cancer Res	SLC7A11	0.1464
Model-41	36119844	Wei	Am J Cancer Res	LAT	0.0328
Model-41	36119844	Wei	Am J Cancer Res	GOT1	-0.0017
Model-41	36119844	Wei	Am J Cancer Res	DGLUCY	-0.0242
Model-42	36118874	Cheng	Front Genet	IYD	-1.1404
Model-42	36118874	Cheng	Front Genet	NNMT	0.1243
Model-42	36118874	Cheng	Front Genet	ACADSB	-0.414
Model-42	36118874	Cheng	Front Genet	GLDC	-0.2061
Model-42	36118874	Cheng	Front Genet	PSAT1	0.2789
Model-43	36092880	Mei	Front Genet	ATP7B	0.043
Model-43	36092880	Mei	Front Genet	DBT	-0.216
Model-43	36092880	Mei	Front Genet	DLAT	-0.08
Model-43	36092880	Mei	Front Genet	LIAS	0.056
Model-43	36092880	Mei	Front Genet	PDHB	0.032
Model-44	36059531	Xie	Front Immunol	ETV4	0.28
Model-44	36059531	Xie	Front Immunol	SH2B3	0.631
Model-44	36059531	Xie	Front Immunol	FATE1	-0.338
Model-44	36059531	Xie	Front Immunol	GRK5	0.363
Model-44	36059531	Xie	Front Immunol	MALL	-0.42
Model-44	36059531	Xie	Front Immunol	HRH2	-0.196
Model-44	36059531	Xie	Front Immunol	SEMA3G	-0.354
Model-44	36059531	Xie	Front Immunol	SLC10A6	-0.431
Model-45	36035192	Yu	Front Genet	CX3CL1	0.918
Model-45	36035192	Yu	Front Genet	TIMP1	1.272
Model-45	36035192	Yu	Front Genet	PLAUR	1.438
Model-45	36035192	Yu	Front Genet	CCL22	0.352
Model-45	36035192	Yu	Front Genet	IL15RA	1.453
Model-46	35949606	Liu	Oncol Lett	ADCY1	-0.551
Model-46	35949606	Liu	Oncol Lett	ADIPOQ	0.353
Model-46	35949606	Liu	Oncol Lett	ADORA2B	0.323
Model-46	35949606	Liu	Oncol Lett	CCL7	0.993
Model-46	35949606	Liu	Oncol Lett	CXCL3	-0.657
Model-46	35949606	Liu	Oncol Lett	GPS2	0.335
Model-46	35949606	Liu	Oncol Lett	HGF	0.171
Model-46	35949606	Liu	Oncol Lett	IL1RL2	-0.355
Model-46	35949606	Liu	Oncol Lett	IL4	3.465
Model-46	35949606	Liu	Oncol Lett	IL17C	-5.383
Model-46	35949606	Liu	Oncol Lett	IL22	8.456
Model-46	35949606	Liu	Oncol Lett	LIPA	-0.266
Model-46	35949606	Liu	Oncol Lett	LRRC19	-0.17
Model-46	35949606	Liu	Oncol Lett	LTB4R2	0.463
Model-46	35949606	Liu	Oncol Lett	RORA	-0.585
Model-46	35949606	Liu	Oncol Lett	SOCS3	0.257
Model-46	35949606	Liu	Oncol Lett	TPSB2	-0.306
Model-46	35949606	Liu	Oncol Lett	WNT5A	0.282
Model-47	35945780	Wang	Medicine (Baltimore)	PDIA2	0.2292
Model-47	35945780	Wang	Medicine (Baltimore)	PAEP	0.061
Model-47	35945780	Wang	Medicine (Baltimore)	AMELX	0.1904
Model-47	35945780	Wang	Medicine (Baltimore)	GREM2	0.0491
Model-47	35945780	Wang	Medicine (Baltimore)	INHA	0.0937
Model-48	35936012	Hua	Front Immunol	TMSB4Y	-0.36
Model-48	35936012	Hua	Front Immunol	PLAU	-0.217
Model-48	35936012	Hua	Front Immunol	GNAI1	0.399
Model-48	35936012	Hua	Front Immunol	VIM	0.299
Model-48	35936012	Hua	Front Immunol	CDH1	0.258
Model-48	35936012	Hua	Front Immunol	VAV3	-0.351
Model-48	35936012	Hua	Front Immunol	SEMA3G	-0.356
Model-48	35936012	Hua	Front Immunol	SEMA6D	-0.431
Model-48	35936012	Hua	Front Immunol	BMP1	0.627
Model-48	35936012	Hua	Front Immunol	CHGA	0.945
Model-48	35936012	Hua	Front Immunol	IL11	0.683
Model-48	35936012	Hua	Front Immunol	TSLP	0.787
Model-48	35936012	Hua	Front Immunol	TACR1	0.579
Model-48	35936012	Hua	Front Immunol	TEK	-0.327
Model-48	35936012	Hua	Front Immunol	THRB	-0.621
Model-48	35936012	Hua	Front Immunol	PRKX	-0.486
Model-48	35936012	Hua	Front Immunol	TNIP1	-0.606
Model-48	35936012	Hua	Front Immunol	GATA4	-1.142
Model-48	35936012	Hua	Front Immunol	SREBF2	0.705
Model-49	35860566	Pei	Front Oncol	LRFN1	0.433
Model-49	35860566	Pei	Front Oncol	CSF1	0.448
Model-49	35860566	Pei	Front Oncol	UCN	0.376
Model-49	35860566	Pei	Front Oncol	TUBB2B	0.19
Model-49	35860566	Pei	Front Oncol	SERPINF1	0.201
Model-49	35860566	Pei	Front Oncol	ADAM8	0.271
Model-49	35860566	Pei	Front Oncol	ABCB4	-0.579
Model-49	35860566	Pei	Front Oncol	CCL22	-1.055
Model-50	35761938	Wang	Oncol Lett	YTHDF2	-0.54
Model-50	35761938	Wang	Oncol Lett	YTHDC2	0.67
Model-50	35761938	Wang	Oncol Lett	FMR1	-1.05
Model-50	35761938	Wang	Oncol Lett	ELAVL1	1.43
Model-51	35686121	Wang	Front Immunol-2	SHC1	0.12
Model-51	35686121	Wang	Front Immunol-2	WNT5A	0.37
Model-51	35686121	Wang	Front Immunol-2	NRP1	-0.12
Model-51	35686121	Wang	Front Immunol-2	TGFA	-0.06
Model-51	35686121	Wang	Front Immunol-2	IL4R	0.12
Model-52	35663389	Tang	Front Cell Dev Biol	DLX4	0.7145
Model-52	35663389	Tang	Front Cell Dev Biol	PLCB2	0.0439
Model-52	35663389	Tang	Front Cell Dev Biol	FIRRE	0.8463
Model-52	35663389	Tang	Front Cell Dev Biol	IL11	0.0752
Model-52	35663389	Tang	Front Cell Dev Biol	ADH6	-0.0178
Model-52	35663389	Tang	Front Cell Dev Biol	EIF4A1	0.0026
Model-53	35656315	Peng	Front Genet	MSH3	-0.581
Model-53	35656315	Peng	Front Genet	RAD54L	0.075
Model-53	35656315	Peng	Front Genet	RAD50	-0.01
Model-53	35656315	Peng	Front Genet	EME1	0.189
Model-53	35656315	Peng	Front Genet	UNG	0.197
Model-53	35656315	Peng	Front Genet	NEIL3	0.104
Model-54	35627236	Bian	Genes (Basel)	FDX1	-0.44
Model-54	35627236	Bian	Genes (Basel)	DLAT	-0.28
Model-54	35627236	Bian	Genes (Basel)	CDKN2A	0.23
Model-55	35617983	Shen	Aging (Albany NY)	TRIM4	-0.474815
Model-55	35617983	Shen	Aging (Albany NY)	TRIM7	-0.140412
Model-55	35617983	Shen	Aging (Albany NY)	TRIM27	0.962029
Model-55	35617983	Shen	Aging (Albany NY)	TRIM58	-0.142716
Model-55	35617983	Shen	Aging (Albany NY)	TRIM65	0.544067
Model-55	35617983	Shen	Aging (Albany NY)	TRIM72	0.127513
Model-56	35571068	Li	Front Genet-2	NOP2	0.0617464
Model-56	35571068	Li	Front Genet-2	METTL14	-0.235953
Model-56	35571068	Li	Front Genet-2	NSUN5	-0.0144879
Model-56	35571068	Li	Front Genet-2	HNRNPA2B1	0.00653711
Model-56	35422048	Li	Front Genet-2	ZC3H13	-0.111546
Model-57	35422048	Sun	World J Surg Oncol	CBS	3.8463
Model-57	35422048	Sun	World J Surg Oncol	HMOX1	-0.0021
Model-57	35422048	Sun	World J Surg Oncol	CD44	0.0101
Model-57	35422048	Sun	World J Surg Oncol	AKR1C2	0.0208
Model-57	35422048	Sun	World J Surg Oncol	CHAC1	0.0252
Model-57	35422048	Sun	World J Surg Oncol	HMGCR	-0.1354
Model-57	35422048	Sun	World J Surg Oncol	SLC7A11	0.3774
Model-58	35402182	Guan	Transl Cancer Res	KIAA1429	0.438496
Model-58	35402182	Guan	Transl Cancer Res	METTL14	-1.06679
Model-58	35402182	Guan	Transl Cancer Res	METTL3	0.603583
Model-58	35402182	Guan	Transl Cancer Res	YTHDF2	0.782748
Model-58	35402182	Guan	Transl Cancer Res	ZC3H13	0.534749
Model-59	35371994	Zheng	Front Oncol-2	TRIM1	-0.202
Model-59	35371994	Zheng	Front Oncol-2	TRIM13	-0.167
Model-59	35371994	Zheng	Front Oncol-2	TRIM2	-0.044
Model-59	35371994	Zheng	Front Oncol-2	TRIM35	-0.133
Model-59	35371994	Zheng	Front Oncol-2	TRIM26	-0.075
Model-59	35371994	Zheng	Front Oncol-2	TRIM55	-0.058
Model-59	35371994	Zheng	Front Oncol-2	TRIM47	0.039
Model-59	35371994	Zheng	Front Oncol-2	TRIM27	0.318
Model-60	35309925	Zhang	Front Cell Dev Biol-2	NOP2	0.656941
Model-60	35309925	Zhang	Front Cell Dev Biol-2	NSUN6	0.911107
Model-60	35309925	Zhang	Front Cell Dev Biol-2	TET2	-1.18053
Model-61	35281845	Lin	Front Genet	AIM2	0.584
Model-61	35281845	Lin	Front Genet	CASP5	0.2736
Model-61	35281845	Lin	Front Genet	DFNB59	0.5347
Model-61	35281845	Lin	Front Genet	GSDMC	0.154
Model-61	35281845	Lin	Front Genet	ZBP1	0.208
Model-62	35237298	He	Front Genet	BIRC5	0.000355
Model-62	35237298	He	Front Genet	CAPS	0.000382
Model-62	35237298	He	Front Genet	CLDN7	-0.000131
Model-62	35237298	He	Front Genet	CLVS1	0.001747
Model-62	35237298	He	Front Genet	GMIP	-0.00033
Model-62	35237298	He	Front Genet	IFI16	8.2e-05
Model-62	35237298	He	Front Genet	TCIRG1	0.000118
Model-63	35140327	Huang	Sci Rep	ANKRD12	-0.12685
Model-63	35140327	Huang	Sci Rep	CYB5A	-0.29841
Model-63	35140327	Huang	Sci Rep	ECHDC3	-0.10969
Model-63	35140327	Huang	Sci Rep	MT1E	0.04216
Model-63	35140327	Huang	Sci Rep	AKT1S1	0.61537
Model-64	34960256	Shi	Vaccines (Basel)	FN1	0.0015
Model-64	34960256	Shi	Vaccines (Basel)	IL6	0.019
Model-64	34960256	Shi	Vaccines (Basel)	COL4A4	-0.1338
Model-64	34960256	Shi	Vaccines (Basel)	COL9A2	0.0772
Model-64	34960256	Shi	Vaccines (Basel)	COL7A1	0.0422
Model-65	34868460	Wu	Oxid Med Cell Longev	ACAD11	-0.0911
Model-65	34868460	Wu	Oxid Med Cell Longev	ACADSB	-0.2774
Model-65	34868460	Wu	Oxid Med Cell Longev	BID	0.3854
Model-65	34868460	Wu	Oxid Med Cell Longev	PYCR1	0.2156
Model-65	34868460	Wu	Oxid Med Cell Longev	SLC25A27	0.2005
Model-65	34868460	Wu	Oxid Med Cell Longev	STAR	0.1091
Model-66	34804944	Jiang	Front Oncol	AIM2	0.0271113
Model-66	34804944	Jiang	Front Oncol	GSDMB	0.0414764
Model-66	34804944	Jiang	Front Oncol	IL6	0.0174866
Model-66	34804944	Jiang	Front Oncol	PYCARD	0.0196802
Model-66	34804944	Jiang	Front Oncol	TIRAP	-0.0867827
Model-67	34692518	Gao	Front Oncol-1	RABPN1	0.0234
Model-67	34692518	Gao	Front Oncol-1	RNF10	0.067
Model-67	34692518	Gao	Front Oncol-1	UBE2T	0.089
Model-67	34692518	Gao	Front Oncol-1	IFT57	-0.0924
Model-67	34692518	Gao	Front Oncol-1	RNF19B	-0.0432
Model-68	34660570	Zhan	Front Cell Dev Biol	LAIR1	0.11
Model-68	34660570	Zhan	Front Cell Dev Biol	C16orf54	-0.2
Model-68	34660570	Zhan	Front Cell Dev Biol	FMNL1	-0.16
Model-68	34660570	Zhan	Front Cell Dev Biol	NOD2	0.42
Model-68	34660570	Zhan	Front Cell Dev Biol	WDFY4	-0.97
Model-69	34631874	Wu	Int J Genomics	NOP2	0.3587
Model-69	34631874	Wu	Int J Genomics	NSUN2	0.2297
Model-69	34631874	Wu	Int J Genomics	NSUN3	-0.0095
Model-69	34631874	Wu	Int J Genomics	NSUN4	-0.0992
Model-69	34631874	Wu	Int J Genomics	NSUN5	0.1508
Model-69	34631874	Wu	Int J Genomics	DNMT3B	0.4538
Model-69	34631874	Wu	Int J Genomics	TET2	-0.6042
Model-70	34629897	Li	Int J Gen Med	MSX1	0.202457
Model-70	34629897	Li	Int J Gen Med	TIMP1	0.000522859
Model-70	34629897	Li	Int J Gen Med	JAG2	-0.10953
Model-71	34611422	Liu	J Inflamm Res	NUP93	0.249933
Model-71	34611422	Liu	J Inflamm Res	DDX60	-0.09398
Model-71	34611422	Liu	J Inflamm Res	ST8SIA4	-0.05168
Model-71	34611422	Liu	J Inflamm Res	IFI44	0.049088
Model-71	34611422	Liu	J Inflamm Res	ST3GAL5	0.1214
Model-71	34611422	Liu	J Inflamm Res	TDRD7	-0.15864
Model-71	34611422	Liu	J Inflamm Res	C1S	0.003466
Model-72	34537809	Hua	Cell Death Discov	RELT	0.24649
Model-72	34537809	Hua	Cell Death Discov	TNFSF14	0.07762
Model-72	34537809	Hua	Cell Death Discov	EDA	-0.06576
Model-72	34537809	Hua	Cell Death Discov	TNFRSF1A	0.23024
Model-72	34537809	Hua	Cell Death Discov	HHLA2	-0.14268
Model-72	34537809	Hua	Cell Death Discov	TNFRSF25	0.05969
Model-72	34537809	Hua	Cell Death Discov	TNFRSF19	-0.05832
Model-72	34537809	Hua	Cell Death Discov	TNFSF4	0.30355
Model-72	34537809	Hua	Cell Death Discov	TNFRSF6B	0.05369
Model-72	34537809	Hua	Cell Death Discov	LTBR	0.13797
Model-72	34537809	Hua	Cell Death Discov	TNFSF15	-0.02679
Model-72	34537809	Hua	Cell Death Discov	TNFRSF10A	-0.06274
Model-72	34537809	Hua	Cell Death Discov	CD274	-0.08476
Model-73	34471382	Li	Cancer Manag Res	NOP2	0.0804
Model-73	34471382	Li	Cancer Manag Res	NSUN4	-0.1318
Model-73	34471382	Li	Cancer Manag Res	NSUN6	0.2682
Model-73	34471382	Li	Cancer Manag Res	TET2	-0.3593
Model-74	34422053	Wang	J Oncol	CCL13	0.118931
Model-74	34422053	Wang	J Oncol	KIAA1429	-0.177806
Model-74	34422053	Wang	J Oncol	AQP9	0.015864
Model-74	34422053	Wang	J Oncol	CCL21	0.006363
Model-74	34422053	Wang	J Oncol	HAMP	0.261579
Model-75	34370716	Zheng	Aging (Albany NY)	CD44	0.015
Model-75	34370716	Zheng	Aging (Albany NY)	DPP4	-0.005
Model-75	34370716	Zheng	Aging (Albany NY)	NCOA4	-0.017
Model-75	34370716	Zheng	Aging (Albany NY)	SLC7A11	0.432
Model-75	34370716	Zheng	Aging (Albany NY)	CD44	0.015
Model-75	34370716	Zheng	Aging (Albany NY)	DPP4	-0.005
Model-75	34370716	Zheng	Aging (Albany NY)	NCOA4	-0.017
Model-75	34370716	Zheng	Aging (Albany NY)	SLC7A11	0.432
Model-76	34367965	Gao	Front Oncol-2	BID	0.49
Model-76	34367965	Gao	Front Oncol-2	TAZ	0.7
Model-76	34367965	Gao	Front Oncol-2	MT1G	0.09
Model-76	34367965	Gao	Front Oncol-2	SLC7A11	0.45
Model-77	34249761	Chen	Front Oncol-2	AKR1C1	-0.1579
Model-77	34249761	Chen	Front Oncol-2	CARS1	0.9231
Model-77	34249761	Chen	Front Oncol-2	HMGCR	-0.8143
Model-77	34249761	Chen	Front Oncol-2	CRYAB	-0.1171
Model-77	34249761	Chen	Front Oncol-2	MT1G	0.0701
Model-77	34249761	Chen	Front Oncol-2	NCOA4	-0.3461
Model-77	34249761	Chen	Front Oncol-2	ACACA	0.8348
Model-77	34249761	Chen	Front Oncol-2	FADS2	0.206
Model-78	34178024	Zhao	Front Genet-1	CARS1	0.1581
Model-78	34178024	Zhao	Front Genet-1	CD44	0.004
Model-78	34178024	Zhao	Front Genet-1	FANCD2	0.1968
Model-78	34178024	Zhao	Front Genet-1	HMGCR	-0.0464
Model-78	34178024	Zhao	Front Genet-1	NCOA4	-0.0091
Model-78	34178024	Zhao	Front Genet-1	SLC7A11	0.0225
Model-78	34178024	Zhao	Front Genet-1	ACACA	0.0352
Model-79	33996565	Chang	Front Oncol	CARS	0.217
Model-79	33996565	Chang	Front Oncol	CD44	0.0098
Model-79	33996565	Chang	Front Oncol	DPP4	-0.0053
Model-79	33996565	Chang	Front Oncol	USP30-AS1	-0.307
Model-79	33996565	Chang	Front Oncol	GCLC	0.103
Model-79	33996565	Chang	Front Oncol	HMGCR	-0.151
Model-79	33996565	Chang	Front Oncol	HSPB1	-0.0006
Model-79	33996565	Chang	Front Oncol	NCOA4	-0.0094
Model-79	33996565	Chang	Front Oncol	SAT1	-0.0024
Model-79	33996565	Chang	Front Oncol	PHKG2	0.1523
Model-79	33996565	Chang	Front Oncol	GOT1	-0.007
Model-79	33996565	Chang	Front Oncol	HMOX1	-0.0024
Model-80	33869003	Zhang	Front Oncol-2	CSRNP1	-0.224
Model-80	33869003	Zhang	Front Oncol-2	CSRNP2	0.82
Model-80	33869003	Zhang	Front Oncol-2	CSRNP3	-1.428
Model-81	33836688	Xing	BMC Cancer	ANKZF1	0.028
Model-81	33836688	Xing	BMC Cancer	CD44	0.0054
Model-81	33836688	Xing	BMC Cancer	CHST6	0.355
Model-81	33836688	Xing	BMC Cancer	HS6ST2	0.4116
Model-81	33836688	Xing	BMC Cancer	IDUA	0.1155
Model-81	33836688	Xing	BMC Cancer	KIF20A	0.108
Model-81	33836688	Xing	BMC Cancer	NDST3	-1.274
Model-81	33836688	Xing	BMC Cancer	PLOD2	0.0052
Model-81	33836688	Xing	BMC Cancer	VCAN	0.0059
Model-81	33836688	Xing	BMC Cancer	FBP1	-0.011
Model-82	33686951	Guo	Aging (Albany NY)	RRM2	0.0361
Model-82	33686951	Guo	Aging (Albany NY)	ALDH6A1	-0.0184
Model-83	33488669	Guo	Front Genet	ISG15	0.007674
Model-83	33488669	Guo	Front Genet	RAD51AP1	0.323186
Model-83	33488669	Guo	Front Genet	SFRP2	0.004232
Model-83	33488669	Guo	Front Genet	SLFN11	0.056129
Model-83	33488669	Guo	Front Genet	SPATA18	-0.04544
Model-83	33488669	Guo	Front Genet	VAV3	-0.03492
Model-84	33372609	Zhang	Cancer Cell Int-3	SEMA3B	0.0148813
Model-84	33372609	Zhang	Cancer Cell Int-3	KCNH2	0.0505623
Model-84	33372609	Zhang	Cancer Cell Int-3	INHA	-0.0645472
Model-84	33372609	Zhang	Cancer Cell Int-3	BPIFA2	-0.0158622
Model-84	33372609	Zhang	Cancer Cell Int-3	FGF19	-0.0372787
Model-84	33372609	Zhang	Cancer Cell Int-3	IL20	0.259134
Model-84	33372609	Zhang	Cancer Cell Int-3	GDNF	-0.0451704
Model-84	33372609	Zhang	Cancer Cell Int-3	ANGPTL7	-0.0611695
Model-84	33372609	Zhang	Cancer Cell Int-3	MUC5AC	-0.140672
Model-84	33372609	Zhang	Cancer Cell Int-3	HLA-DQA1	-0.0141856
Model-85	33296352	Li	Med Sci Monit	MMP24	-0.1841
Model-85	33296352	Li	Med Sci Monit	ACE2	-0.1096
Model-85	33296352	Li	Med Sci Monit	SLC44A4	-0.103
Model-85	33296352	Li	Med Sci Monit	C1R	0.149
Model-85	33296352	Li	Med Sci Monit	C1ORF194	0.2328
Model-85	33296352	Li	Med Sci Monit	ADAMTS15	0.2841
Model-86	32419773	Chen	Cancer Cell Int	METTL14	-0.385
Model-86	32419773	Chen	Cancer Cell Int	METTL3	0.121
Model-87	32328125	Zheng	Evid Based Complement Alternat Med	IFI16	0.5409
Model-87	32328125	Zheng	Evid Based Complement Alternat Med	IL1RL1	-0.0698
Model-87	32328125	Zheng	Evid Based Complement Alternat Med	AIM2	0.1449
Model-87	32328125	Zheng	Evid Based Complement Alternat Med	TXNIP	-0.3261
Model-87	32328125	Zheng	Evid Based Complement Alternat Med	APP	-0.5283
Model-88	32044664	Shen	Int Immunopharmacol	IFI30	-0.1519
Model-88	32044664	Shen	Int Immunopharmacol	WNT5A	0.1596
Model-88	32044664	Shen	Int Immunopharmacol	IRF9	0.1199
Model-88	32044664	Shen	Int Immunopharmacol	AGER	0.0994
Model-88	32044664	Shen	Int Immunopharmacol	PLAUR	0.0469
Model-88	32044664	Shen	Int Immunopharmacol	TEK	-0.0659
Model-88	32044664	Shen	Int Immunopharmacol	BID	0.079
Model-89	31930049	Zhang	Ann Transl Med	CRP	0.04208
Model-89	31930049	Zhang	Ann Transl Med	DNASE1	0.347889
Model-89	31930049	Zhang	Ann Transl Med	IL20RB	0.11819
Model-89	31930049	Zhang	Ann Transl Med	KIT	-0.027266
Model-89	31930049	Zhang	Ann Transl Med	MAL	-0.007359
Model-89	31930049	Zhang	Ann Transl Med	PLCG2	-0.256051
Model-90	31194719	Pan	Med Sci Monit	OTX1	0.725
Model-90	31194719	Pan	Med Sci Monit	MATN4	0.473
Model-90	31194719	Pan	Med Sci Monit	PI3	0.548
Model-90	31194719	Pan	Med Sci Monit	ERVV-2	0.458
Model-90	31194719	Pan	Med Sci Monit	NFE4	0.41
Model-91	30417359	Chen	J Cell Physiol	CENPW	0.307
Model-91	30417359	Chen	J Cell Physiol	FOXM1	0.149
Model-91	30417359	Chen	J Cell Physiol	NUF2	0.033
Model-92	36536785	Zhang	J Oncol	FDX1	-0.6044
Model-92	36536785	Zhang	J Oncol	PDHB	-0.1197
Model-92	36536785	Zhang	J Oncol	CDKN2A	0.2386
Model-93	36439501	Xiong	Front Oncol	COL4A4	-0.000332379
Model-93	36439501	Xiong	Front Oncol	FREM2	-0.0453284
Model-93	36439501	Xiong	Front Oncol	P3H1	0.286242
Model-93	36439501	Xiong	Front Oncol	SERPINF1	0.00925436
Model-93	36439501	Xiong	Front Oncol	TLL1	-0.00392657
Model-93	36439501	Xiong	Front Oncol	ACHE	0.104432
Model-93	36439501	Xiong	Front Oncol	ADAMTS14	0.192193
Model-93	36439501	Xiong	Front Oncol	CD44	0.0481638
Model-93	36439501	Xiong	Front Oncol	MMP17	0.0880108
Model-93	36439501	Xiong	Front Oncol	NPNT	-0.121726
Model-94	35812454	Wang	Front Immunol-3	AMD1	-0.201
Model-94	35812454	Wang	Front Immunol-3	CCSER2	0.396
Model-94	35812454	Wang	Front Immunol-3	CIB1	0.475
Model-94	35812454	Wang	Front Immunol-3	DRAP1	-0.335
Model-94	35812454	Wang	Front Immunol-3	HMGB2	0.31
Model-94	35812454	Wang	Front Immunol-3	HMGN1	0.43
Model-94	35812454	Wang	Front Immunol-3	NPIPB5	0.851
Model-94	35812454	Wang	Front Immunol-3	PTP4A2	0.408
Model-94	35812454	Wang	Front Immunol-3	RORA	-1.035
Model-94	35812454	Wang	Front Immunol-3	SAP18	-0.354
Model-95	36612165	Chang	Cancers (Basel)	IFNAR1	-0.223
Model-95	36612165	Chang	Cancers (Basel)	RGP1	-0.286
Model-96	36568252	Ding	Front Oncol	FASN	0.204117
Model-96	36568252	Ding	Front Oncol	ACOT9	0.151747
Model-96	36568252	Ding	Front Oncol	MID1IP1	0.149099
Model-96	36568252	Ding	Front Oncol	CYP2C9	0.147525
Model-96	36568252	Ding	Front Oncol	ABCD1	0.106468
Model-96	36568252	Ding	Front Oncol	CPT2	-0.20157
Model-96	36568252	Ding	Front Oncol	CRAT	-0.222481
Model-96	36568252	Ding	Front Oncol	TP53INP2	-0.240641
Model-96	36568252	Ding	Front Oncol	FAAH2	-0.278899
Model-96	36568252	Ding	Front Oncol	PTPRG	-0.314233
Model-97	36591111	Yu	J Healthc Eng	ALDH6A1	-0.2968
Model-97	36591111	Yu	J Healthc Eng	ANGPTL4	-0.1879
Model-97	36591111	Yu	J Healthc Eng	DLD	0.1895
Model-97	36591111	Yu	J Healthc Eng	NNT	-0.2116
Model-97	36591111	Yu	J Healthc Eng	PDHA1	0.3843
Model-97	36591111	Yu	J Healthc Eng	PHKA2	0.2912
Model-97	36591111	Yu	J Healthc Eng	SLC25A4	-0.4706
Model-97	36591111	Yu	J Healthc Eng	SUCLG1	0.4357
Model-98	36544490	Zhao	Front Genet-2	TNNT1	0.11597
Model-98	36544490	Zhao	Front Genet-2	SAA1	0.07741
Model-98	36544490	Zhao	Front Genet-2	IL20RB	0.15255
Model-98	36544490	Zhao	Front Genet-2	COL22A1	0.10302
Model-98	36544490	Zhao	Front Genet-2	B3GALT5	-0.11426
Model-98	36544490	Zhao	Front Genet-2	C10orf99	-0.09019
Model-99	36338978	Chen	Front Genet	CHEK2	0.719
Model-99	36338978	Chen	Front Genet	PDK4	-0.171
Model-99	36338978	Chen	Front Genet	ZNF304	-0.725
Model-99	36338978	Chen	Front Genet	SNAI2	0.413
Model-99	36338978	Chen	Front Genet	SRC	0.479
Model-100	36588677	Liu	Front Pharmacol	ORAI3	0.31411
Model-100	36588677	Liu	Front Pharmacol	TRPV4	-0.19961
Model-100	36588677	Liu	Front Pharmacol	TRPM3	-0.256
Model-100	36588677	Liu	Front Pharmacol	ATPRA1	0.3977
Model-100	36588677	Liu	Front Pharmacol	ITPR1	-0.28296
Model-101	36618968	Fan	Dis Markers	CTLA4	0.24
Model-101	36618968	Fan	Dis Markers	TNFSF14	0.341
Model-101	36618968	Fan	Dis Markers	HHLA2	-0.227
