# Supplementary material for: Machine learning-based on cytotoxic T lymphocyte evasion gene develops a novel signature to predict prognosis and immunotherapy responses for kidney renal clear cell carcinoma patients
Source: Front Immunol. 2023 Jul 31;14:1192428. doi: 10.3389/fimmu.2023.1192428 (PMC10436106; doi:10.3389/fimmu.2023.1192428)
Supplement: SUPPLEMENTARY TABLE 2 — 182 CTLEGs from published literature. [file Table_2.xlsx]

## Sheet: Sheet1
Gene
B2M
IFNGR1
JAK2
SOCS1
TAP1
TAP2
TAPBP
ADAR
ATG10
ATG101
CFLAR
FITM2
GPAA1
GPI1
IFNGR2
IKBKG
IRF1
JAK1
OTUD5
PTPN2
RBCK1
STAT1
STAT2
TNFAIP3
TNFRSF1A
TRAF2
ATG12
ATG3
ATG5
BECN1
CHIC2
DNTTIP1
EMC8
ERAP1
ERP44
FADD
HDAC1
IST1
MAP3K7
MEN1
MOGS
NDUFA13
NXT1
OTULIN
PDIA3
PIGS
PIGU
PPP2R2A
PSMB8
RB1CC1
RBM15
RIC8
RNF31
SCAF4
SMG7
TAB1
TAB2
TMEM127
TNFRSF1B
UBE2G2
UBE2N
VDAC2
VPS29
VPS35
VPS4B
WIPI2
ZCCHC14
ACAD9
ACTB
AGO2
AHSA1
ANAPC15
ARF6
ATG14
ATG7
ATG9A
ATP13A1
ATXN7L3
BC003331
BCL2L1
BOLA3
BRAT1
BRPF1
CAD
CALR
CEP55
CHMP5
COX6C
CREBBP
CUL3
DCP1A
DET1
DICER1
DNAJC13
DOT1L
DPH5
EIF3H
EMC2
EMC3
EMC4
EMC6
F8A
FAM58B
FAS
FNTB
GALE
GLS
H2-K1
HCFC2
HDGFRP2
HEXIM1
HIRA
HSPA13
IFNAR1
IFNAR2
IKBKB
INO80
IPPK
IRF9
JAGN1
JMJD6
KAT6A
KLF16
KMT2A
LIPT2
MAPK1
MED16
MED23
MED24
MGAT1
MTA2
N6AMT1
NCBP1
NDUFAF6
NPLOC4
NUP188
PCBP2
PCED1B
PDCD6IP
PDSS2
PI4KB
PIGK
PIGT
PKN2
PPP1CA
PPP1R8
PPP2R3C
PRKCSH
PSMB9
PSMG1
PTAR1
RCE1
RGP1
RIC1
S100PBP
SARNP
SETD1A
SETDB1
SLC25A32
SPCS1
SRRT
SRSF7
STOML2
SUSD6
TBK1
TFRC
TGFBR2
TMEM208
TRADD
TRPM7
UBR5
UFC1
UFL1
USP7
UXS1
VPS13A
VPS16
WDR7
WDR83
WWP2
YAP1
ZC3H3
