# Supplementary material for: Machine learning-based on cytotoxic T lymphocyte evasion gene develops a novel signature to predict prognosis and immunotherapy responses for kidney renal clear cell carcinoma patients
Source: Front Immunol. 2023 Jul 31;14:1192428. doi: 10.3389/fimmu.2023.1192428 (PMC10436106; doi:10.3389/fimmu.2023.1192428)
Supplement: SUPPLEMENTARY TABLE 8 — 608 DEGs between high- and low-risk groups. [file Table_8.xlsx]

## Sheet: riskDiff
Gene	lowMean	highMean	logFC	pValue	FDR
AP000553.4	0.932015	1.92135	1.0437	2.45946e-08	6.71755e-08
HSH2D	2.10823	4.77746	1.18021	3.3891e-18	5.20816e-17
IGHV3-69-1	1.7367	6.33415	1.8668	0.000973747	0.00149842
IGFL2-AS1	0.455781	3.6776	3.01235	3.67512e-06	7.6415e-06
OVOL1	2.33105	1.08216	-1.10707	2.03384e-14	1.38024e-13
COL8A2	5.0038	10.0718	1.00923	0.000688256	0.00108029
IGKV1OR2-6	0.752479	2.56047	1.76668	0.0157858	0.0205903
AL713899.1	2.94553	5.94972	1.0143	3.87777e-11	1.54702e-10
SEMA3D	5.56233	2.48388	-1.16309	1.00378e-10	3.78213e-10
HSD11B1	2.86474	9.23955	1.68942	1.75787e-05	3.38053e-05
AC120349.1	0.792631	1.59792	1.01147	6.00931e-11	2.33236e-10
DBH-AS1	2.25508	4.7917	1.08736	4.99106e-16	4.62869e-15
CTSK	12.2673	27.3566	1.15707	0.000102394	0.000177886
SAPCD1	0.707004	1.76676	1.32131	2.12847e-19	4.54153e-18
IGKV3-15	54.6831	223.784	2.03294	0.00137311	0.00207086
IGHG1	667.598	2600.93	1.96198	5.94384e-06	1.20627e-05
IGKJ5	4.54838	17.5181	1.94542	1.22968e-07	3.07186e-07
PTPRH	0.729888	4.20649	2.52687	2.02336e-13	1.15925e-12
CRYGS	2.79904	6.98693	1.31972	3.57513e-22	1.6408e-20
CA4	18.5309	8.73506	-1.08504	8.86656e-14	5.37454e-13
COL7A1	0.957352	5.49568	2.52118	1.6406e-17	2.11948e-16
LINC02365	1.15885	3.36052	1.53599	0.00747975	0.0102336
SIX2	0.763103	1.96322	1.36327	0.000884498	0.00136826
AC148477.4	2.11749	1.02086	-1.05256	0.0303837	0.0380707
MMP2-AS1	1.07855	2.35075	1.12403	1.30816e-10	4.84746e-10
IGHV1-69	11.2445	35.9513	1.67683	0.0182857	0.0236337
LINC02446	0.93242	2.03664	1.12714	0.000787537	0.00122718
VIL1	18.1952	7.57728	-1.2638	6.61261e-13	3.47723e-12
SYT9	8.79811	4.03208	-1.12567	8.33275e-13	4.30336e-12
LUCAT1	1.64702	4.03407	1.29238	1.30868e-10	4.84831e-10
C9	0.662516	1.4706	1.15037	8.04549e-05	0.000141622
IGHV5-10-1	18.9012	50.0738	1.40557	0.00238773	0.00349278
IGLV4-69	21.4686	127.051	2.56511	0.00022957	0.000382744
IGKV3-20	231.517	607.158	1.39095	0.00287417	0.00416108
FDCSP	1.33017	70.054	5.71879	2.11587e-09	6.61894e-09
SST	317.042	73.3375	-2.11205	1.44002e-09	4.60886e-09
LINC01788	1.90052	0.785776	-1.2742	9.31236e-08	2.36863e-07
AC120498.10	0.787543	2.40217	1.60891	1.52546e-08	4.26993e-08
GNG8	0.719615	1.76679	1.29583	3.81552e-13	2.09098e-12
C4BPA	1.26088	4.40592	1.80501	1.89927e-08	5.25834e-08
ITGA2B	0.538349	2.25199	2.06459	1.17142e-10	4.36931e-10
KIF1C-AS1	0.804606	1.64044	1.02773	1.11427e-21	4.37159e-20
IGLV6-57	43.6797	136.664	1.6456	0.000388219	0.000628226
ACAD11	2.39757	1.1278	-1.08806	1.2934e-18	2.23354e-17
POU2AF1	1.19511	3.36301	1.49261	1.41992e-06	3.09011e-06
GABRB3	6.23611	2.39917	-1.37811	4.09463e-19	8.02293e-18
TRIM46	1.07445	2.15072	1.00122	1.41319e-10	5.19929e-10
TDO2	1.08166	2.82539	1.38521	8.36736e-05	0.000147029
SCNN1G	2.00596	11.5382	2.52406	0.0356677	0.0442293
AL079338.1	3.20653	10.2633	1.67841	0.000271948	0.000449254
AC023669.2	9.90331	3.71735	-1.41364	0.00282547	0.00409476
PANK1	12.8367	6.23426	-1.04199	1.14904e-25	1.82847e-23
IGKV2-28	1.44659	10.2971	2.83152	0.0325779	0.0406139
APOH	3.19648	37.8958	3.56748	0.000815952	0.00126902
IGLV3-1	95.0427	433.406	2.18907	0.000234769	0.000390985
IGHV3-43	4.9231	17.9313	1.86484	0.0163302	0.0212612
PCBP3	0.413418	1.8188	2.13732	3.16784e-08	8.54004e-08
PKP3	2.03332	5.70592	1.48862	2.90201e-07	6.89494e-07
S100G	0.589059	7.38428	3.64797	2.61455e-07	6.25164e-07
AC002044.1	0.923453	1.93378	1.06631	4.05968e-19	7.96362e-18
GPR84	1.3483	2.71017	1.00724	6.07128e-11	2.35373e-10
SNORD104	15.6904	32.9489	1.07035	3.26386e-15	2.58964e-14
CEL	0.937602	2.27059	1.27602	1.28916e-09	4.15967e-09
SLC38A3	0.69615	1.63768	1.23418	0.00473148	0.00665479
CCNO	1.01924	2.43373	1.25568	1.2373e-08	3.49435e-08
STEAP3	18.1907	41.1428	1.17744	3.79908e-08	1.01422e-07
IGLV1-51	1.49153	3.1024	1.05659	0.0318479	0.0397649
CRP	4.28957	22.5904	2.39681	0.000592212	0.000936093
FGA	38.4172	121.964	1.66663	0.00241781	0.00353435
ASIC3	0.881959	1.93063	1.13029	9.191e-22	3.72611e-20
PDGFRL	3.40993	8.18265	1.26283	1.60533e-06	3.46835e-06
MTND4P24	4.32381	10.782	1.31824	6.86293e-05	0.000121902
SLC6A18	28.0275	10.2148	-1.45618	5.58391e-10	1.8951e-09
SFRP1	12.845	5.99031	-1.10051	0.0274942	0.0346389
IGLC7	6.43338	28.7869	2.16177	7.47884e-07	1.68531e-06
SLC17A9	3.77608	8.89832	1.23664	2.82137e-17	3.44863e-16
BIRC5	4.44555	9.72959	1.13002	8.07515e-12	3.54644e-11
GOLGA8B	4.97998	10.6068	1.09077	5.62022e-19	1.05624e-17
SLC6A19	54.1711	16.7946	-1.68952	2.01357e-16	2.00766e-15
COL10A1	1.12551	3.40854	1.59858	3.5979e-06	7.48918e-06
AC004847.1	1.86137	3.82715	1.03991	8.40343e-13	4.33462e-12
IGHM	169.761	590.617	1.79872	6.4443e-06	1.30086e-05
IGHV2-70	8.51788	66.7471	2.97014	0.00333826	0.00478658
SCGN	143.125	64.1558	-1.15762	4.25742e-13	2.30863e-12
SLC16A12	96.0806	43.592	-1.14018	1.41697e-21	5.43397e-20
MIR155HG	4.9776	10.3536	1.05661	6.07712e-14	3.78891e-13
AC025265.1	1.46023	3.2013	1.13246	1.66577e-10	6.07608e-10
PLA2G2D	1.97903	4.92054	1.31403	6.55674e-05	0.000116804
GYG2	1.17532	2.49646	1.08684	5.06716e-08	1.33352e-07
ADGRB1	0.836296	3.36673	2.00926	2.72117e-19	5.64353e-18
CEP55	3.82729	7.67037	1.00297	6.27315e-10	2.11093e-09
NUDT11	0.585997	1.49102	1.34733	0.000470182	0.000752635
MGAM	32.6273	13.8963	-1.23137	1.75841e-19	3.80922e-18
CD177	0.561518	6.71015	3.57894	0.0124058	0.016427
SNTG2-AS1	1.0205	6.08505	2.57599	5.36536e-17	6.13127e-16
IGKV6D-21	2.78815	6.7719	1.28025	2.18851e-05	4.15983e-05
DDX43P3	0.647983	1.64712	1.34592	2.50908e-07	6.01297e-07
TNXA	0.875321	2.51348	1.5218	3.60588e-11	1.44771e-10
HSD17B6	1.04558	3.86249	1.88523	0.00317694	0.00457104
TMEM82	13.3436	6.4818	-1.04169	2.65791e-12	1.26556e-11
TRHDE	8.0693	3.62093	-1.15609	5.49384e-26	1.08505e-23
PROM1	45.4094	20.955	-1.1157	0.0180149	0.0232908
RPL29P19	1.11723	2.93038	1.39116	3.64058e-08	9.73584e-08
AC007906.2	5.03369	2.50072	-1.00927	0.0112344	0.0149631
IGLV1-41	2.00571	5.58868	1.47839	0.0123185	0.0163177
AHSG	0.593988	3.21238	2.43514	0.0108619	0.0145136
GNMT	0.704045	2.54186	1.85215	6.99296e-16	6.33366e-15
TMEM252	52.3342	24.1584	-1.11523	4.41049e-18	6.55301e-17
MOCOS	2.37019	5.832	1.29899	2.784e-13	1.56292e-12
IGHV3-19	0.63793	1.42907	1.16361	0.011847	0.0157274
CXCL13	7.54229	22.688	1.58885	1.0122e-07	2.56126e-07
AC012236.1	0.518963	1.73237	1.73904	5.30158e-25	6.94385e-23
RNU6-44P	3.19816	1.31481	-1.28239	6.11681e-07	1.39444e-06
HAO2	59.4226	23.8151	-1.31914	6.20247e-17	6.96173e-16
ITPKA	1.61871	7.01536	2.11567	2.03207e-13	1.16304e-12
IGSF23	0.641844	1.75515	1.4513	6.40029e-08	1.66152e-07
HAMP	1.02953	2.56351	1.31613	7.93171e-12	3.48884e-11
IGKV3D-15	3.95423	9.60999	1.28114	0.0123078	0.0163047
SCX	1.07089	2.87299	1.42374	6.24734e-11	2.41818e-10
IGLC3	155.309	701.604	2.17551	1.17636e-07	2.94687e-07
MXD3	1.70353	3.91292	1.19972	1.17168e-36	1.99501e-32
IGKV1-16	33.0789	75.955	1.19924	0.00893948	0.0121168
TFPI2	48.1931	102.413	1.0875	0.0359026	0.0444882
IGHV1-18	61.5984	216.839	1.81566	0.0202816	0.0260296
CCDC78	0.883047	2.12353	1.2659	3.4176e-14	2.21766e-13
CARMIL2	1.02705	2.13508	1.05579	2.23187e-13	1.26716e-12
SLC5A1	57.5915	21.4544	-1.42459	5.26779e-18	7.66621e-17
AC004687.1	1.64504	3.74791	1.18796	3.53995e-17	4.23872e-16
IGLV3-21	64.8373	229.924	1.82626	0.000262735	0.000434835
INHBE	1.3669	4.16546	1.60757	0.00698336	0.00959304
KCNN4	1.77873	4.1432	1.2199	1.57935e-16	1.60356e-15
AC008105.3	1.25603	3.39614	1.43502	7.23104e-23	4.2873e-21
AC003092.1	1.13607	5.01278	2.14156	4.09891e-06	8.46992e-06
IGKV3OR2-268	2.22109	4.65113	1.06631	0.00133184	0.00201289
AC120057.4	1.27718	2.89637	1.18129	2.29673e-14	1.53599e-13
IGHG2	155.838	369.405	1.24516	0.000127657	0.000219158
SBSN	0.149519	2.03258	3.76491	4.65013e-13	2.50721e-12
AC083967.1	0.708005	2.02513	1.51618	0.0394539	0.0486164
AC142381.1	0.740792	1.59737	1.10856	0.0134391	0.017718
IGLV8-61	30.8257	75.7394	1.29691	0.00561252	0.00782225
LRRC15	0.758244	4.75173	2.64772	8.6369e-05	0.000151531
NFE4	0.207	3.51314	4.08506	6.19355e-05	0.00011074
LINC00942	0.579866	3.73757	2.68831	2.54901e-10	9.08944e-10
EGFL6	1.10023	5.14879	2.22643	8.13814e-05	0.000143223
IGKV1D-16	3.34842	7.11877	1.08815	0.00219822	0.0032311
PTTG1	7.79876	16.386	1.07115	2.44812e-17	3.05154e-16
LIX1	8.13319	3.04937	-1.41531	0.0030643	0.00441869
ZBED2	1.33273	2.86777	1.10554	2.95539e-07	7.01736e-07
SLC18A3	0.802045	7.62177	3.24837	0.000144671	0.000246578
ALDH6A1	38.7107	17.3755	-1.15568	4.59103e-32	2.60572e-28
TRPM3	4.42696	2.2	-1.00882	2.4975e-15	2.0279e-14
LINC02167	0.125707	1.91075	3.926	0.00670705	0.00924105
LRP2	168.428	70.6059	-1.25427	6.06771e-24	5.49547e-22
RN7SL67P	0.726634	1.5967	1.13579	1.02423e-10	3.85489e-10
AC124854.1	28.1537	10.3707	-1.44081	2.5253e-23	1.74082e-21
TRIM54	3.717	8.35757	1.16894	0.000964583	0.00148582
CPNE7	1.45822	5.68408	1.96272	1.82437e-21	6.78258e-20
ADCYAP1	2.37039	0.838688	-1.49892	2.60169e-07	6.2227e-07
PRSS3	0.259146	2.62443	3.34017	0.0028024	0.0040642
HS6ST3	1.93303	0.476527	-2.02023	3.55001e-07	8.34891e-07
AL078604.2	0.627508	1.4437	1.20207	6.20933e-20	1.46638e-18
IGLL5	0.717288	2.29578	1.67836	1.07942e-07	2.72164e-07
TF	1.22776	6.36338	2.37377	1.85235e-10	6.7235e-10
PRG4	0.458476	1.67053	1.86538	2.41091e-07	5.79157e-07
TRBJ1-2	2.38171	4.79462	1.00942	1.93805e-07	4.7135e-07
UGT2B4	0.251647	1.82062	2.85496	0.0355511	0.0440912
BMP5	1.62471	0.777229	-1.06377	0.000346276	0.000563461
C2CD4A	1.82938	3.73521	1.02984	0.00681744	0.00937995
AC133644.1	2.84415	7.21605	1.34321	2.10639e-11	8.7798e-11
C1orf210	31.3527	14.0942	-1.15349	4.77786e-26	9.57091e-24
IGHJ5	2.27034	11.2755	2.31221	4.23833e-10	1.46381e-09
CD7	7.10143	17.8246	1.32768	3.88469e-09	1.17153e-08
IGHV3-15	56.183	135.241	1.26733	0.0184212	0.0237946
EDNRB	154.722	76.9195	-1.00825	5.92332e-21	1.93211e-19
CYP2C9	0.932241	2.63256	1.49769	1.23224e-09	3.98355e-09
DGKI	3.6834	1.63929	-1.16797	4.97402e-13	2.67001e-12
TRPC2	1.64069	3.8351	1.22496	1.39118e-05	2.71212e-05
KCTD16	2.72382	1.06049	-1.3609	2.30265e-17	2.88504e-16
NPEPL1	2.73463	6.75154	1.30387	2.21952e-31	6.29862e-28
IGKV1-33	0.659603	2.70007	2.03333	0.00338788	0.00485322
AC020907.4	2.15502	4.62128	1.10059	7.97176e-17	8.67872e-16
REEP2	0.916358	1.88054	1.03717	4.60538e-06	9.45338e-06
TCEAL2	2.34589	0.670575	-1.80666	4.33209e-06	8.9236e-06
PANX2	0.892643	2.90744	1.70359	3.38283e-09	1.02856e-08
CILP2	0.347637	2.44388	2.81352	1.98361e-09	6.23178e-09
IGHV3-30	60.1599	214.798	1.83611	0.0157993	0.0206047
DACT2	2.78183	1.37724	-1.01425	5.91021e-05	0.000105974
IGLV2-5	2.1163	4.90709	1.21333	0.000116348	0.000200816
AL513164.1	0.799186	1.76646	1.14426	0.00462309	0.00650664
IFNG	1.50851	3.33736	1.14559	3.49947e-06	7.28964e-06
CORO6	0.625802	1.84566	1.56036	8.47712e-25	1.00236e-22
PPARGC1A	17.0976	8.5463	-1.00042	2.96489e-22	1.39842e-20
TREM1	1.97375	4.79393	1.28027	0.0310219	0.0387962
CYP4F12	0.9116	1.90231	1.06128	5.87199e-06	1.19211e-05
MZB1	5.56437	19.0918	1.77866	7.1052e-10	2.37123e-09
IGKV1D-8	3.29465	7.1583	1.11949	0.000830542	0.00129041
AC064836.3	1.35982	2.97804	1.13095	4.03063e-22	1.80604e-20
MAT1A	1.71723	4.95719	1.52944	3.01984e-09	9.23968e-09
ADGRG3	0.653535	1.406	1.10526	3.85913e-07	9.03347e-07
AC092535.5	9.40245	19.7986	1.07429	1.59284e-14	1.10205e-13
APCDD1L	1.29913	7.30788	2.49191	0.000551511	0.000875579
ACHE	2.64655	5.98327	1.17682	2.88356e-09	8.84019e-09
IGLV1-44	66.1431	201.955	1.61037	0.000335912	0.000547747
AC005387.1	0.845226	1.90715	1.17401	1.54321e-20	4.30759e-19
IGHA1	541.835	1151.63	1.08775	0.000105565	0.000183189
TNFSF14	2.50614	6.60448	1.39798	9.98576e-18	1.36022e-16
SNORD3A	6.80871	24.085	1.82268	3.67422e-10	1.27989e-09
CPXM1	6.83602	14.2347	1.05818	6.56052e-07	1.48763e-06
IGKV2D-28	1.30253	3.75473	1.5274	0.0102533	0.0137553
AC003102.1	1.78123	3.56984	1.00298	4.5101e-20	1.10654e-18
IGHV3OR16-8	0.756415	1.89628	1.32592	0.0141771	0.0186246
LINC02294	6.30049	2.60542	-1.27395	1.79081e-07	4.37414e-07
ANGPTL8	2.32405	15.795	2.76476	3.88181e-14	2.50172e-13
AKR1B10	12.4249	29.1475	1.23014	2.8535e-07	6.78772e-07
AC021146.1	1.3369	2.73015	1.03009	0.0113767	0.015142
WFDC5	0.734085	5.5043	2.90654	1.04699e-07	2.64378e-07
KIF18B	1.265	3.27679	1.37314	8.74163e-21	2.71615e-19
LMO1	0.729338	2.38657	1.71028	6.65154e-06	1.34078e-05
IGHV4-39	80.4539	219.219	1.44614	0.00179573	0.00266783
IGHJ2	6.16408	17.4203	1.49881	0.000268081	0.000443296
KISS1	1.03789	3.0814	1.56993	0.000732524	0.00114597
TNFRSF17	1.19342	2.84346	1.25255	3.72798e-06	7.7448e-06
COMP	4.06371	8.84055	1.12134	5.67644e-05	0.000102084
PCK1	104.179	42.608	-1.28987	4.15578e-15	3.24292e-14
CLSTN2	4.07671	1.73423	-1.23311	0.0144436	0.0189455
F2	2.48505	11.6104	2.22407	4.02549e-10	1.39448e-09
AC022432.1	1.04048	2.82667	1.44185	1.58769e-18	2.67337e-17
LINC00973	0.140514	2.29872	4.03205	8.77091e-06	1.74526e-05
CCL26	1.14881	2.78654	1.27833	1.55584e-07	3.83242e-07
IGLV3-16	0.914509	14.0292	3.93929	0.00104619	0.00160423
AC022079.1	1.05871	2.61602	1.30507	1.52225e-05	2.95378e-05
ITGB2-AS1	2.87663	6.5892	1.19572	2.66056e-17	3.27322e-16
PPDPFL	6.54654	25.9354	1.98612	0.00620189	0.00858895
PLK1	2.01042	4.57296	1.18563	9.02875e-19	1.61654e-17
MYMX	0.371268	3.12093	3.07145	0.000394744	0.000638118
LINC01615	0.89102	2.40739	1.43394	7.78955e-07	1.75185e-06
AP000553.7	1.56636	3.19525	1.02851	2.649e-10	9.42229e-10
CDCA3	1.44189	3.51832	1.28693	7.75498e-28	3.47485e-25
MUC13	2.81332	6.14451	1.12702	0.001719	0.00256232
PRR33	1.19547	2.45723	1.03945	7.82027e-17	8.53562e-16
IL20RB	14.6159	45.656	1.64327	1.57558e-16	1.60164e-15
OCLN	5.37082	2.59249	-1.05081	8.30609e-17	8.99096e-16
ARSI	0.780657	2.42879	1.63748	1.27674e-08	3.60098e-08
AL731567.1	1.48743	3.75578	1.33629	2.70407e-19	5.62126e-18
AC099684.2	2.38356	0.81052	-1.5562	0.000322519	0.000527372
DHDH	20.0294	9.34433	-1.09996	3.96717e-11	1.58047e-10
CARD14	0.652185	1.38229	1.0837	2.09365e-13	1.19547e-12
TNNT3	1.33161	6.60793	2.31103	0.00376676	0.00536483
AL096701.1	0.632071	1.51077	1.25712	1.022e-18	1.81266e-17
AC108752.1	1.64713	4.64235	1.4949	4.10638e-05	7.51094e-05
SLC22A13	2.70475	1.10489	-1.2916	1.00059e-09	3.27197e-09
IGHV3-48	32.2262	122.582	1.92744	0.0220703	0.0281871
IGHV3-71	0.561073	1.80396	1.68491	0.000341059	0.000555446
VWFP1	3.30205	1.29001	-1.35598	2.43347e-19	5.12807e-18
AC027796.4	1.7959	4.10161	1.19148	3.87637e-22	1.7554e-20
IGLV5-48	0.645267	1.81292	1.49035	0.00218708	0.00321528
LINC02577	1.03499	2.20071	1.08836	9.50204e-10	3.11736e-09
LOXL1	7.66253	15.8685	1.05027	1.40944e-08	3.95688e-08
RTL1	0.0260733	2.32687	6.47967	8.97451e-05	0.000157033
SLC22A24	2.26202	0.856874	-1.40046	1.4655e-16	1.50048e-15
MIR4420	1.06827	2.32274	1.12056	5.97359e-08	1.5569e-07
CIDEC	1.14331	4.19304	1.87478	1.7634e-06	3.79301e-06
ARMC12	0.742124	1.53986	1.05306	1.37586e-19	3.03849e-18
C1QL1	41.6283	93.6181	1.16922	3.5e-07	8.24153e-07
IGLV5-37	1.31316	3.40779	1.37579	0.00184015	0.00273
UCHL1	17.2722	36.9315	1.0964	4.85967e-05	8.80741e-05
ADAMTS14	1.01331	2.95714	1.54513	1.20429e-20	3.5052e-19
FGG	65.537	141.113	1.10647	0.0329528	0.0410511
CEMIP	1.26148	3.26132	1.37034	0.00241609	0.00353213
SLC16A9	93.4572	44.6709	-1.06497	9.24698e-18	1.26872e-16
USP2	25.961	12.1668	-1.09339	1.01876e-14	7.30067e-14
IGLC6	0.719475	2.15467	1.58245	1.80382e-06	3.87504e-06
GSDMB	2.52593	5.7288	1.18142	7.69841e-24	6.62024e-22
ITIH3	1.38856	7.12689	2.35969	1.2534e-06	2.74455e-06
F3	7.38543	19.2065	1.37884	0.00488406	0.00685468
IGLV2-8	26.4267	61.2486	1.21268	0.00141724	0.00213363
CTXN3	6.76902	2.16072	-1.64744	5.85484e-08	1.52852e-07
PPP1R1A	10.3167	32.2159	1.6428	1.02822e-09	3.35524e-09
CHRDL2	1.34687	4.62596	1.78014	5.80108e-06	1.17828e-05
NEB	1.2327	2.60803	1.08114	1.36323e-08	3.83537e-08
CYP4A22	10.76	5.10304	-1.07625	1.1049e-12	5.60083e-12
CCL11	0.787943	2.1404	1.44172	8.41909e-07	1.88621e-06
AC018742.1	7.0508	3.32742	-1.08338	3.05892e-10	1.07634e-09
AL135844.1	2.96573	6.01404	1.01995	6.12237e-16	5.61063e-15
RNU7-186P	1.65415	3.45792	1.06381	1.41982e-10	5.22143e-10
COL22A1	1.38536	3.53414	1.3511	7.87289e-10	2.61159e-09
IGLV2-11	64.3116	167.861	1.38411	0.00443571	0.00626207
HP	8.0941	110.281	3.76818	7.8792e-08	2.02199e-07
C8G	1.65146	4.17859	1.33928	2.57722e-17	3.18912e-16
ISLR	21.8663	48.2466	1.14172	0.000165195	0.000279516
MIR6819	2.13652	4.66035	1.12518	2.24636e-14	1.50883e-13
AL139351.3	1.06432	2.24233	1.07506	4.11819e-12	1.89324e-11
IGKV4-1	157.638	317.394	1.00967	0.00541094	0.00755429
PKLR	28.011	13.5249	-1.05038	3.2488e-14	2.11631e-13
GGT6	4.47654	1.07102	-2.0634	6.78585e-05	0.000120621
HOTAIRM1	1.99258	4.03019	1.01621	1.2967e-18	2.23697e-17
IGKV1D-43	0.411795	2.80433	2.76766	0.0001208	0.000208079
IGHV4-59	33.7148	149.443	2.14814	0.00873327	0.0118506
FLNC	3.95966	12.5919	1.66905	0.000157447	0.000267043
IGHV1-69D	27.1024	68.2964	1.33339	0.00945175	0.0127686
CCDC85A	2.55243	1.22688	-1.05687	2.47414e-20	6.56188e-19
FST	2.8344	8.07397	1.51023	0.0167772	0.0218115
AL139349.1	3.04639	7.27113	1.25508	9.43152e-18	1.29092e-16
MMP17	0.861551	1.77529	1.04304	4.07317e-13	2.21936e-12
AC104695.3	5.32778	13.4104	1.33175	8.5667e-17	9.2554e-16
AP005233.2	6.51963	18.1385	1.4762	6.47085e-11	2.50066e-10
KCNS1	1.08678	2.8715	1.40174	4.96227e-13	2.66454e-12
ESRRG	4.95411	2.31761	-1.09599	2.62418e-19	5.46236e-18
CCNA1	0.403232	1.65188	2.03443	1.97169e-14	1.34129e-13
FOXM1	4.16835	9.01732	1.11322	1.13483e-07	2.84997e-07
LINC02061	3.46349	1.23545	-1.48719	3.8577e-14	2.48713e-13
ADAM8	5.10457	11.2864	1.14472	1.11151e-15	9.66092e-15
LINC00626	2.64021	5.94723	1.17156	0.0234625	0.029851
FLRT3	32.9957	15.836	-1.05907	3.51602e-19	7.04322e-18
CHST9	8.66294	4.18499	-1.04963	2.96194e-14	1.94272e-13
SLC27A2	69.3111	31.12	-1.15525	2.16659e-22	1.08502e-20
MELTF	1.34798	5.71858	2.08485	1.07833e-10	4.04244e-10
RNU6-1280P	1.65685	3.4841	1.07234	1.76503e-12	8.69846e-12
KIF20A	4.10528	8.99651	1.13188	7.45668e-12	3.29437e-11
SAA2	1.72379	19.7623	3.51909	5.16783e-14	3.2685e-13
RARRES1	13.3145	29.3195	1.13886	7.52064e-07	1.69451e-06
CDC20	6.30901	14.4525	1.19583	6.36773e-11	2.46249e-10
IGHV4-34	35.4001	104.736	1.56493	0.0125416	0.0165976
FER1L4	4.63001	10.2471	1.14613	2.25796e-17	2.83318e-16
ARL14EPL	0.0266947	2.52038	6.56094	1.19019e-09	3.85567e-09
IGHGP	84.5675	328.272	1.95672	3.89692e-06	8.06918e-06
KRT20	0.333941	5.44521	4.02732	0.0120782	0.0160181
AC048341.2	4.69712	10.3421	1.13869	1.47289e-20	4.13843e-19
AC023669.1	8.89698	3.50792	-1.3427	0.00710219	0.00974763
CUBN	162.488	68.2476	-1.25149	3.56518e-22	1.64066e-20
TCN1	0.523713	3.96174	2.91929	7.23789e-11	2.78445e-10
ITIH2	0.571746	4.4648	2.96515	3.46394e-08	9.2898e-08
OMG	1.46553	5.3386	1.86504	9.27082e-15	6.70009e-14
IGHV6-1	17.9029	71.9101	2.006	0.00677016	0.00931896
IGLV1-40	199.059	698.25	1.81055	0.000499671	0.000796768
IL1R2	14.5946	38.4568	1.3978	0.0030193	0.00435933
LAMP5	1.53399	4.42118	1.52714	7.15538e-06	1.43657e-05
LBP	19.5254	157.704	3.01379	1.34662e-06	2.93809e-06
CLMP	1.39227	6.47105	2.21656	5.71511e-08	1.49388e-07
CILP	0.568122	2.26691	1.99646	4.41878e-15	3.43085e-14
IGKC	3227.44	10006.7	1.6325	1.11859e-06	2.46394e-06
ZNF114	2.50028	6.431	1.36295	0.00539195	0.00753086
LINC01436	2.37626	7.06554	1.57211	2.79202e-09	8.57964e-09
INSYN2B	6.08755	2.96428	-1.03818	1.98489e-14	1.34971e-13
IGLV3-9	10.0085	32.1485	1.68352	0.000972212	0.00149646
STMN2	0.601074	4.72529	2.97479	2.77363e-08	7.52616e-08
IGLV2-28	6.94203	17.9978	1.37439	0.0180123	0.0232908
TAL2	11.1032	5.35867	-1.05103	2.25677e-19	4.78531e-18
MFSD2A	2.85319	6.52876	1.19423	2.50611e-10	8.94958e-10
YJEFN3	1.86878	4.02928	1.10842	9.89651e-16	8.68597e-15
GBA3	131.689	62.7918	-1.06849	2.44417e-22	1.19246e-20
AP001029.1	1.08715	2.25309	1.05135	1.67519e-13	9.75492e-13
CD79A	7.55994	18.7724	1.31217	2.29865e-05	4.3546e-05
MMP13	0.365485	2.82546	2.9506	7.85826e-08	2.01723e-07
IGHJ4	8.15706	25.8237	1.66258	0.000561463	0.0008903
SMIM22	0.49447	1.51213	1.61262	0.0009689	0.0014919
MIR4539	1.22313	3.81103	1.63961	6.84696e-06	1.37805e-05
WFDC3	0.732633	1.71492	1.22698	7.50137e-12	3.31325e-11
TNNT1	0.839143	7.07134	3.07499	1.51858e-15	1.2909e-14
IGLJ2	0.51901	1.61091	1.63404	0.00253063	0.00368976
NMRAL2P	0.575747	1.54571	1.42477	1.34142e-10	4.96098e-10
DHPS	1.8475	3.7951	1.03856	3.45499e-17	4.15746e-16
IGKV1-17	26.5738	93.2414	1.81097	0.00139771	0.00210646
FREM2	7.4039	3.56656	-1.05375	2.21575e-22	1.10638e-20
HCAR2	0.875992	2.11239	1.26989	5.24075e-06	1.07085e-05
CREB3L1	4.50993	11.1388	1.30442	0.00723892	0.00992328
IGHV3-49	24.5202	74.3952	1.60124	0.039772	0.0489659
IGLV1-50	0.912462	2.22923	1.28871	0.000295882	0.000486245
AL627309.6	1.5996	3.94718	1.30311	4.10543e-16	3.87556e-15
IZUMO4	1.14609	2.59353	1.1782	6.52474e-24	5.81659e-22
IGHV4-28	4.43805	17.5676	1.98492	0.0161083	0.0209932
COL1A1	276.692	560.493	1.01841	0.00034109	0.000555446
SLC25A48	2.39532	1.14285	-1.06757	6.53907e-15	4.8898e-14
BSPRY	11.3046	5.48	-1.04466	1.26303e-14	8.91609e-14
U47924.3	0.7998	1.78688	1.15973	3.20381e-22	1.50393e-20
AL161782.1	2.14213	1.06504	-1.00813	5.51767e-19	1.04041e-17
AVPR1B	10.379	4.90416	-1.08159	1.73486e-13	1.00652e-12
CYP4F32P	1.21395	2.57929	1.08726	3.03676e-06	6.37099e-06
LINC01711	0.317265	2.51518	2.9869	5.34301e-15	4.08694e-14
ORM2	0.320227	12.844	5.32586	7.79443e-10	2.58705e-09
IGKV1-6	21.4286	54.67	1.35121	0.0163001	0.0212263
CXCL1	12.5709	37.5502	1.57874	6.54912e-06	1.32092e-05
RPS23P6	1.24508	2.95469	1.24677	1.16184e-19	2.60642e-18
ITIH1	0.469629	3.73309	2.99078	4.01347e-07	9.37154e-07
CPA4	2.12747	7.00251	1.71873	4.37589e-07	1.01561e-06
SFN	11.6773	25.0239	1.0996	4.99813e-05	9.04102e-05
IGKV3D-20	8.16678	21.3567	1.38685	0.014799	0.0193773
RFLNA	2.61748	5.68068	1.11788	6.10634e-06	1.23689e-05
AP003717.1	1.18976	2.43658	1.03419	3.24706e-08	8.74114e-08
PABPC1L	7.78664	18.4311	1.24307	4.09866e-22	1.8317e-20
PRSS2	0.791411	1.59493	1.01099	0.0074673	0.0102183
MIR6753	0.699151	1.76282	1.33421	6.48517e-16	5.90497e-15
IGLV3-27	5.30218	18.5708	1.80837	0.000667494	0.001049
SLC22A8	2.75102	0.837045	-1.71659	1.51705e-11	6.44479e-11
MIR4685	0.685301	1.40968	1.04055	1.61295e-07	3.96531e-07
GHR	14.2301	6.47595	-1.13578	9.32603e-21	2.85601e-19
ZBP1	1.02883	2.06849	1.00758	2.14214e-12	1.0359e-11
SLC47A1	167.558	83.3358	-1.00765	7.97518e-20	1.85005e-18
ADH4	0.264815	3.30237	3.64045	0.0106493	0.0142507
AC018752.1	6.3178	3.09097	-1.03136	1.81616e-24	1.92073e-22
PAEP	0.904287	31.5279	5.1237	4.16153e-14	2.66786e-13
VPS9D1-AS1	1.10022	2.30151	1.06479	8.08201e-16	7.20861e-15
BASP1	21.1195	44.9321	1.08917	7.34167e-09	2.13104e-08
PRAME	6.16067	19.3249	1.6493	4.509e-12	2.05941e-11
UBE2C	8.62425	30.1995	1.80805	1.17501e-21	4.57825e-20
MELTF-AS1	1.55116	3.87299	1.3201	1.03962e-24	1.21244e-22
AC090578.1	0.582072	2.22449	1.9342	1.26702e-07	3.15866e-07
TPSG1	4.00808	11.786	1.55609	1.99311e-05	3.8067e-05
PYCR1	4.8453	10.126	1.06341	3.35799e-06	7.01466e-06
PDK4	795.781	340.444	-1.22495	1.01528e-15	8.89715e-15
RSPO4	0.490153	1.61989	1.72459	1.48236e-15	1.26264e-14
CD19	0.520419	1.64963	1.66439	3.05377e-09	9.33679e-09
MIR4326	0.94069	2.24677	1.25606	7.08194e-13	3.70345e-12
TNFRSF18	2.42572	5.01215	1.04702	2.30842e-20	6.17042e-19
MMP9	20.5305	43.7082	1.09014	9.89148e-07	2.19729e-06
SNORA33	6.22721	14.7484	1.2439	2.26029e-28	1.23767e-25
AC124319.1	0.676894	1.68721	1.31764	1.31871e-20	3.77967e-19
NUF2	1.59814	3.31362	1.05201	3.59659e-13	1.98057e-12
JCHAIN	136.04	275.458	1.0178	0.00266464	0.0038752
UGT1A10	0.448662	2.02888	2.17699	0.00041126	0.000663495
IGHV3-64D	13.6392	39.2963	1.52663	0.00127176	0.00192585
MUC12-AS1	0.718587	1.6673	1.21428	1.34999e-12	6.76475e-12
KCNE5	0.145049	2.29059	3.98111	6.47739e-06	1.30738e-05
CALB2	0.788009	1.71779	1.12427	0.0104887	0.0140492
HSPA7	9.11886	19.4172	1.09041	9.89651e-16	8.68597e-15
MFAP2	1.76835	5.44142	1.62158	0.000328642	0.00053656
PDPN	2.53412	6.42923	1.34316	0.0180149	0.0232908
CXCL5	8.55377	19.7135	1.20455	3.01716e-05	5.63303e-05
NPIPB15	2.62678	5.36307	1.02976	2.96177e-05	5.53628e-05
CCER2	0.740531	1.9409	1.3901	2.76819e-18	4.40916e-17
PADI3	0.449591	5.76728	3.68121	4.45083e-09	1.33118e-08
SLN	3.10461	7.30585	1.23464	1.2172e-06	2.66838e-06
MIR4768	10.4226	23.8333	1.19327	2.97631e-14	1.95064e-13
CCL19	13.1779	33.7224	1.35558	4.84329e-07	1.1185e-06
MIR4489	1.69414	4.15207	1.29328	4.4648e-22	1.97974e-20
JSRP1	1.14971	2.47362	1.10535	3.93857e-10	1.36611e-09
PITX2	0.929916	2.34743	1.33591	6.12611e-06	1.24074e-05
IGKV3D-11	3.39515	9.57874	1.49636	0.00228887	0.00335392
CXCL8	9.69865	23.9624	1.30492	0.0155171	0.0202584
RNU6-26P	1.39785	2.96239	1.08355	2.97892e-07	7.07124e-07
ADAM12	3.42496	7.94009	1.21307	3.79293e-08	1.0129e-07
SNHG25	2.03822	4.2872	1.07272	2.1201e-13	1.20934e-12
AC018695.6	1.00018	2.54122	1.34526	3.58535e-13	1.97629e-12
IGHJ6	8.5492	33.6893	1.97843	0.000753647	0.00117739
RPL29P14	0.80897	1.95972	1.27649	5.00613e-17	5.75942e-16
E2F7	0.761838	1.53791	1.01342	0.000346343	0.000563461
SOWAHB	13.8488	6.78647	-1.02903	7.22442e-31	1.75729e-27
IGHG4	29.703	108.544	1.8696	7.19383e-06	1.4436e-05
C11orf86	1.91604	9.1072	2.24888	0.00674337	0.00928433
IGKJ3	2.22328	12.9863	2.54623	1.55058e-06	3.35814e-06
SCAT2	1.00031	2.516	1.33068	9.4708e-22	3.80486e-20
LINC02783	1.97732	4.4329	1.1647	0.000237872	0.000395957
TOX3	5.22051	2.13355	-1.29094	1.88296e-12	9.20505e-12
IGHV5-51	80.5103	224.485	1.47938	0.0198546	0.0255143
IGLV7-43	11.7631	37.4419	1.67038	0.00165465	0.00247354
SLC22A6	55.4822	24.5533	-1.17611	4.34594e-10	1.49794e-09
IGKV1-9	35.4162	153.162	2.11258	0.00292543	0.00423172
NPIPB5	0.712144	1.44338	1.01921	1.96234e-15	1.6291e-14
MLLT11	2.93321	6.27435	1.09698	1.51161e-05	2.93447e-05
PAGE2B	0.0908539	4.52636	5.63866	1.01462e-11	4.40376e-11
PLG	15.9156	4.82212	-1.72271	1.83997e-11	7.73749e-11
IGKV1-8	4.64158	9.69333	1.06238	0.00110593	0.00168931
UPK3B	0.716712	1.61008	1.16766	4.59697e-16	4.30779e-15
COL11A1	1.42335	6.32183	2.15106	0.00177664	0.00264256
IGHV3OR16-9	0.729796	2.29324	1.65182	0.0103762	0.0139125
IGHV3-33	23.5448	82.6576	1.81174	0.0284087	0.0357328
NPR3	130.595	46.5544	-1.48811	4.6399e-27	1.46303e-24
IGLV2-18	9.80865	30.172	1.62108	0.0115445	0.0153496
SEC31B	2.13082	4.29412	1.01095	2.56469e-17	3.17592e-16
AC034105.1	0.463913	1.61171	1.79666	0.00494265	0.00693234
AMH	0.509691	1.69309	1.73196	2.11556e-13	1.20716e-12
NFKBIZ	8.68035	18.0281	1.05442	9.10157e-16	8.03382e-15
LINC00460	0.357079	1.67109	2.22647	6.90349e-12	3.06508e-11
PTCSC3	1.63531	0.769013	-1.08848	2.62894e-09	8.10482e-09
FOSB	152.169	71.9916	-1.07977	2.97786e-08	8.05336e-08
PODNL1	1.57117	3.3548	1.09439	2.42753e-08	6.63781e-08
HOXB-AS4	1.26775	2.75157	1.11798	1.62125e-08	4.52542e-08
SRPX2	2.31714	6.88583	1.57128	1.22226e-09	3.95278e-09
ASIC1	0.613292	1.47137	1.26251	3.98139e-08	1.0609e-07
SCD5	44.8229	22.0021	-1.02659	1.52661e-08	4.27244e-08
SHISA9	9.29938	3.85743	-1.26949	9.47472e-22	3.80486e-20
IGLV3-10	27.0948	155.172	2.51778	0.000201465	0.000338066
HPX	0.551097	3.40544	2.62746	4.28542e-22	1.90516e-20
UST-AS2	0.709563	1.91469	1.43211	9.62099e-11	3.6331e-10
AC113346.1	0.614278	1.90633	1.63383	6.64042e-10	2.22791e-09
PI3	4.35466	20.1791	2.21223	9.29795e-13	4.75996e-12
LINC02009	0.434151	1.79478	2.04754	1.43037e-05	2.78533e-05
IL6	3.80572	20.5914	2.4358	3.7846e-07	8.87122e-07
C6orf141	0.678541	2.3582	1.79718	2.74113e-12	1.30052e-11
AIM2	2.76314	6.37154	1.20533	2.83267e-07	6.74289e-07
AL096865.1	0.703594	1.7723	1.3328	7.76202e-24	6.6414e-22
SNORD14E	3.64596	16.2551	2.15652	1.69014e-21	6.36681e-20
TEX29	0.629007	1.58439	1.33278	4.09355e-12	1.88431e-11
SNORD100	3.54375	8.71939	1.29895	4.84496e-22	2.1207e-20
PPP2R2C	0.502055	1.65314	1.7193	1.35002e-09	4.34385e-09
IGDCC4	1.82443	4.06549	1.15599	7.56743e-10	2.51563e-09
IGKJ4	4.19199	15.7114	1.90611	5.18144e-08	1.36128e-07
AC002511.2	1.32252	2.86627	1.11588	7.01094e-05	0.000124388
IGKV1D-39	3.43025	8.45793	1.30199	0.00714799	0.0098081
DPEP1	19.3216	8.33647	-1.21271	1.15133e-06	2.53148e-06
PLA2G2A	1.41106	5.11045	1.85667	1.90227e-08	5.26495e-08
CLIC5	7.08652	3.27641	-1.11296	5.63559e-11	2.19683e-10
NAT8B	54.5871	25.6252	-1.091	2.09806e-14	1.41873e-13
CNTNAP5	2.25956	1.06442	-1.08598	1.39232e-09	4.46797e-09
IFI30	0.679854	1.79041	1.39699	5.65671e-22	2.43224e-20
IGFBP1	26.7383	103.961	1.95906	0.00122599	0.00186068
MIAT	0.626361	2.42575	1.95337	1.53035e-21	5.82937e-20
TMEM158	1.93178	7.22576	1.90322	6.29537e-07	1.43189e-06
SLC10A2	29.1794	12.8177	-1.18681	4.66809e-16	4.36723e-15
PAGE5	0.0981835	10.256	6.70678	0.000495583	0.00079062
CENPA	1.39546	3.27418	1.23039	2.73715e-15	2.20986e-14
IGLV3-25	64.2308	172.652	1.42653	0.003448	0.00493519
IGHV1-12	1.0576	2.87822	1.44438	0.00199347	0.00294745
VSTM2L	1.93206	5.43306	1.49163	0.000192807	0.00032408
AL627309.7	2.4272	5.34821	1.13976	2.829e-10	1.00165e-09
GOLGA8A	7.60045	16.2356	1.095	1.15164e-12	5.82039e-12
AC103702.2	3.80568	8.57686	1.1723	1.30988e-07	3.25707e-07
SHISAL1	1.05349	2.32462	1.14182	0.0167772	0.0218115
IGLC2	246.026	900.503	1.87192	4.06705e-07	9.48886e-07
IGLV5-45	7.5429	20.8634	1.46779	0.0197182	0.0253505
ORM1	0.519222	17.7424	5.09471	0.00502626	0.0070438
CAVIN2	126.663	63.1205	-1.00481	1.03312e-22	5.86364e-21
CERKL	2.41641	1.071	-1.17391	2.83163e-13	1.58653e-12
TMEM174	48.5031	14.5347	-1.73858	1.04277e-20	3.12501e-19
SNORC	1.35411	2.7276	1.01029	1.68376e-13	9.79151e-13
KRT13	0.393016	1.76556	2.16747	9.35075e-07	2.08179e-06
GFPT2	5.2948	14.3148	1.43486	6.64649e-10	2.22951e-09
IGHV3-23	103.606	267.264	1.36716	0.017239	0.022359
CHMP4BP1	0.930239	2.20312	1.24388	2.32009e-20	6.19188e-19
SNORD99	7.28561	21.8419	1.58398	8.91774e-28	3.89339e-25
SLC12A8	2.85398	6.5935	1.20807	3.56104e-12	1.65847e-11
MEG3	0.711769	1.65056	1.21347	1.69681e-07	4.15889e-07
PLXNB3	0.740047	2.14462	1.53503	3.68704e-11	1.4775e-10
AURKB	2.65194	6.96907	1.39392	1.06273e-22	5.99177e-21
AC023043.4	1.29885	2.89681	1.15723	2.90113e-19	5.98034e-18
IGKV1-5	111.34	288.028	1.37124	0.00275598	0.00399915
PLTP	90.3727	192.391	1.09008	3.65795e-06	7.60765e-06
WFDC21P	1.34967	3.65617	1.43772	1.07899e-09	3.51282e-09
CCN5	1.7559	7.07192	2.00989	3.55696e-09	1.07785e-08
IGKV3-11	110.934	308.368	1.47495	0.000813958	0.00126603
TENM3	1.31553	2.68261	1.028	0.00392784	0.00557793
CYP4A11	100.331	38.6923	-1.37465	3.06145e-14	2.00338e-13
TBC1D3L	1.4028	3.13036	1.15802	7.36848e-15	5.4313e-14
LINC00926	1.2204	2.61664	1.10036	7.01777e-18	9.9328e-17
LINC02747	46.5381	19.9306	-1.22343	1.13876e-13	6.79148e-13
SLC13A2	3.58961	1.15263	-1.63889	2.68109e-08	7.28665e-08
IGHJ3P	3.13136	15.3509	2.29346	2.86101e-09	8.77895e-09
IGLV7-46	20.4603	119.327	2.54402	0.00157569	0.00236006
TMEM92-AS1	0.870377	2.11565	1.28139	1.6047e-17	2.0794e-16
IGF2BP2	2.40939	5.65856	1.23177	2.68145e-06	5.66044e-06
IGHV1OR15-2	1.37665	3.26604	1.24638	0.0145653	0.0190934
AC015912.3	1.118	2.39001	1.09609	3.76342e-13	2.06576e-12
GPR173	1.69461	3.48107	1.03858	4.46955e-11	1.76491e-10
PIF1	0.609951	1.43861	1.23791	1.56195e-25	2.35356e-23
AP002807.1	1.10964	2.71251	1.28954	2.49386e-20	6.58341e-19
IGKV1-39	2.78439	9.76641	1.81047	0.00242248	0.00354056
IGKV1D-17	0.862268	2.05505	1.25297	0.0135856	0.0178986
PAIP2B	12.834	5.61251	-1.19326	2.95931e-30	4.58074e-27
P3H3	6.78689	13.8857	1.03278	0.0145813	0.0191085
IGKV1-27	21.9167	45.8474	1.06481	0.0219382	0.0280252
GREM2	0.209752	2.37418	3.50068	0.00324689	0.00466499
NMU	1.8722	4.37948	1.22603	1.23497e-08	3.48837e-08
CCL21	25.5933	59.5477	1.21828	0.000221953	0.000370655
IGLV9-49	14.7539	81.4624	2.46504	6.81978e-05	0.000121211
PRR15L	24.5285	8.34435	-1.55559	0.00037295	0.000604783
AQP9	6.05273	17.4748	1.52962	1.76569e-06	3.79746e-06
C5orf38	0.830366	2.34232	1.49612	0.00305186	0.00440261
IGKV1D-13	1.95233	5.7968	1.57006	0.00363657	0.00518592
IGLV2-23	97.9158	320.076	1.7088	0.00274569	0.00398524
ALDH1L1	28.1535	13.9311	-1.01501	4.19078e-19	8.20189e-18
VTN	1.46443	17.9097	3.61233	0.000142307	0.00024289
IGLV3-19	85.7404	481.738	2.4902	0.00161662	0.00241924
CLDN19	3.00642	1.20672	-1.31696	0.00275417	0.00399687
C4orf48	4.6059	10.4374	1.1802	9.97467e-10	3.26236e-09
SLC34A1	9.17538	3.70462	-1.30844	6.27056e-05	0.000112023
IGLV2-14	137.128	414.067	1.59435	0.0161995	0.0211023
NSUN5P1	4.08474	8.51956	1.06053	4.60139e-23	2.92343e-21
MIR7111	1.40505	3.42223	1.28432	1.23496e-18	2.14444e-17
AC005586.1	1.1098	2.28487	1.04181	5.82457e-10	1.97128e-09
LAIR2	1.24444	3.43589	1.46518	0.000120311	0.000207369
SLC22A12	76.5925	27.4091	-1.48255	6.88746e-15	5.11005e-14
HJURP	1.95748	4.84734	1.3082	1.00252e-18	1.78555e-17
IGHV4-55	3.3293	6.85686	1.04233	0.0186815	0.0241069
AL138831.3	1.05926	2.16344	1.03027	9.94388e-20	2.26061e-18
RNVU1-3	0.92788	2.16551	1.2227	1.58766e-15	1.34226e-14
GAD1	0.927914	2.10362	1.18081	1.11722e-07	2.81071e-07
ARTN	0.862782	2.11461	1.29333	4.10081e-14	2.6329e-13
HPR	0.317506	2.611	3.03975	2.63728e-09	8.12908e-09
PITX1	0.807183	2.1937	1.4424	2.96688e-14	1.94521e-13
ERVV-2	0.317243	1.93139	2.60597	3.30155e-11	1.33402e-10
TROAP	1.3447	3.70379	1.46172	5.54409e-26	1.08505e-23
IGHV3-21	58.4652	198.421	1.76291	0.0219385	0.0280252
PAGE2	0.0347985	3.79077	6.76732	4.0259e-11	1.60236e-10
SERPINF1	39.1012	86.1421	1.1395	1.38179e-10	5.09147e-10
SNORA31	1.02204	2.08995	1.03202	1.81284e-14	1.24314e-13
MYBL2	4.59477	12.3707	1.42887	3.7722e-16	3.58223e-15
APOA1	0.683562	7.51801	3.45921	0.0138361	0.0182033
MAPT	27.3016	12.2974	-1.15064	3.85484e-22	1.7503e-20
SAA1	41.7405	492.581	3.56084	7.04411e-14	4.34048e-13
SLC5A8	48.0158	21.0584	-1.18911	2.36106e-16	2.32784e-15
G6PC	9.99585	4.76099	-1.07007	5.85224e-16	5.37465e-15
AP000844.2	1.048	2.57378	1.29625	0.000103968	0.000180529
IGF2BP3	0.385902	1.63654	2.08434	2.45532e-08	6.7084e-08
ZP1	0.496299	1.56959	1.66111	3.08984e-09	9.44198e-09
AC092171.4	1.07822	2.24281	1.05665	8.50783e-17	9.19764e-16
SLC38A5	5.48084	18.5042	1.75539	3.91704e-15	3.06928e-14
IGKV6-21	5.18582	12.162	1.22973	0.0311737	0.0389775
IGLV1-36	6.30387	15.9505	1.33929	0.0087495	0.0118717
